# Supplementary material for: 3-Nitroindoles Serving as N-Centered Nucleophiles for Aza-1,6-Michael Addition to para-Quinone Methides
Source: MDPI journal article supplement (doi:10.3390/molecules28145529), 2023-07-20

# 3-Nitroindoles Serving as *N*-Centered Nucleophiles for Aza-1,6-Michael Addition to *para*-Quinone Methides

Jian-Qiang Zhao<sup>1,\*</sup>, Wen-Jie Wang<sup>1</sup>, Shun Zhou<sup>1,2</sup>, Qi-Lin Xiao<sup>1</sup>, Xi-Sha Xue<sup>1</sup>, Yan-Ping Zhang<sup>1</sup>,  
Yong You<sup>1</sup>, Zhen-Hua Wang<sup>1</sup>, and Wei-Cheng Yuan<sup>1,\*</sup>

1. Innovation Research Center of Chiral Drugs, Institute for Advanced Study, Chengdu University, Chengdu 610106, China
2. National Engineering Research Center of Chiral Drugs, Chengdu Institute of Organic Chemistry, Chinese Academy of Sciences, Chengdu 610041

Correspondence: zhaojianqiang@cdu.edu.cn (J.-Q. Zhao);  
yuanwc@cioc.ac.cn (W.-C. Yuan)

## Supporting Information

### Table of Contents

1. X-Ray crystal data for compound **3l** and **3p**.....S1
2. <sup>1</sup>H, and <sup>13</sup>C NMR spectra for compounds **3**, **6** and **11**.....S3

1. X-Ray crystal data for compounds **3l** and **3p**.

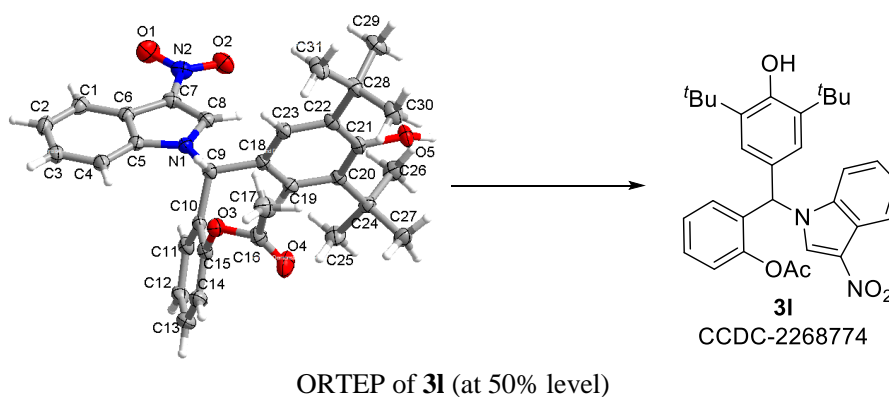

ORTEP of **3l** (at 50% level)

**Table 1 Crystal data and structure refinement for 3l**

|                                             |                                                               |
|---------------------------------------------|---------------------------------------------------------------|
| Identification code                         | <b>3l</b>                                                     |
| Empirical formula                           | C <sub>31</sub> H <sub>34</sub> N <sub>2</sub> O <sub>5</sub> |
| Formula weight                              | 514.60                                                        |
| Temperature/K                               | 293(2)                                                        |
| Crystal system                              | monoclinic                                                    |
| Space group                                 | P2 <sub>1</sub> /c                                            |
| a/Å                                         | 11.4957(2)                                                    |
| b/Å                                         | 22.7104(4)                                                    |
| c/Å                                         | 11.06142(18)                                                  |
| α/°                                         | 90                                                            |
| β/°                                         | 105.5630(18)                                                  |
| γ/°                                         | 90                                                            |
| Volume/Å <sup>3</sup>                       | 2781.95(9)                                                    |
| Z                                           | 4                                                             |
| ρ <sub>calc</sub> /g/cm <sup>3</sup>        | 1.229                                                         |
| μ/mm <sup>-1</sup>                          | 0.672                                                         |
| F(000)                                      | 1096.0                                                        |
| Crystal size/mm <sup>3</sup>                | 0.15 × 0.12 × 0.1                                             |
| Radiation                                   | CuKα (λ = 1.54184)                                            |
| 2θ range for data collection/°              | 7.786 to 140.926                                              |
| Index ranges                                | -9 ≤ h ≤ 13, -27 ≤ k ≤ 26, -13 ≤ l ≤ 11                       |
| Reflections collected                       | 10598                                                         |
| Independent reflections                     | 5213 [R <sub>int</sub> = 0.0319, R <sub>sigma</sub> = 0.0467] |
| Data/restraints/parameters                  | 5213/0/351                                                    |
| Goodness-of-fit on F <sup>2</sup>           | 1.027                                                         |
| Final R indexes [I ≥ 2σ (I)]                | R <sub>1</sub> = 0.0520, wR <sub>2</sub> = 0.1360             |
| Final R indexes [all data]                  | R <sub>1</sub> = 0.0666, wR <sub>2</sub> = 0.1519             |
| Largest diff. peak/hole / e Å <sup>-3</sup> | 0.30/-0.30                                                    |

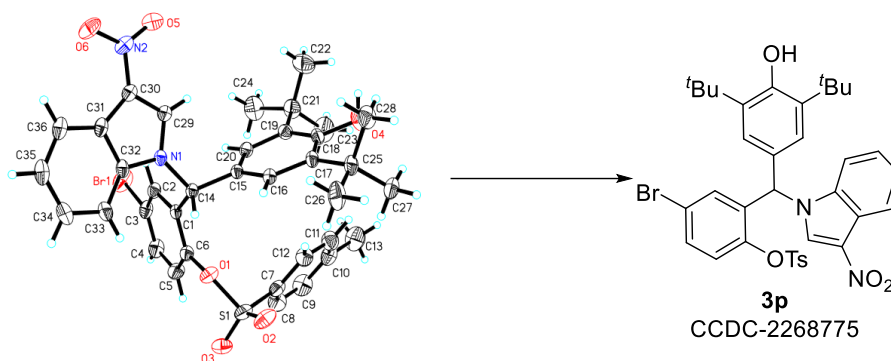

ORTEP of **3p** (at 50% level)

**Table 1 Crystal data and structure refinement for 3p**

|                                             |                                                                   |
|---------------------------------------------|-------------------------------------------------------------------|
| Identification code                         | 3p                                                                |
| Empirical formula                           | C <sub>36</sub> H <sub>37</sub> BrN <sub>2</sub> O <sub>6</sub> S |
| Formula weight                              | 705.64                                                            |
| Temperature/K                               | 249.99(10)                                                        |
| Crystal system                              | monoclinic                                                        |
| Space group                                 | P2 <sub>1</sub> /c                                                |
| a/Å                                         | 11.18050(10)                                                      |
| b/Å                                         | 16.1823(2)                                                        |
| c/Å                                         | 21.0128(2)                                                        |
| α/°                                         | 90                                                                |
| β/°                                         | 95.2830(10)                                                       |
| γ/°                                         | 90                                                                |
| Volume/Å <sup>3</sup>                       | 3785.62(7)                                                        |
| Z                                           | 4                                                                 |
| ρ <sub>calc</sub> /cm <sup>3</sup>          | 1.238                                                             |
| μ/mm <sup>-1</sup>                          | 2.346                                                             |
| F(000)                                      | 1464.0                                                            |
| Crystal size/mm <sup>3</sup>                | 0.13 × 0.12 × 0.1                                                 |
| Radiation                                   | Cu Kα (λ = 1.54184)                                               |
| 2θ range for data collection/°              | 6.906 to 143.3                                                    |
| Index ranges                                | -13 ≤ h ≤ 9, -19 ≤ k ≤ 15, -25 ≤ l ≤ 25                           |
| Reflections collected                       | 22216                                                             |
| Independent reflections                     | 7234 [R <sub>int</sub> = 0.0438, R <sub>sigma</sub> = 0.0404]     |
| Data/restraints/parameters                  | 7234/0/423                                                        |
| Goodness-of-fit on F <sup>2</sup>           | 1.070                                                             |
| Final R indexes [I ≥ 2σ (I)]                | R <sub>1</sub> = 0.0482, wR <sub>2</sub> = 0.1367                 |
| Final R indexes [all data]                  | R <sub>1</sub> = 0.0529, wR <sub>2</sub> = 0.1403                 |
| Largest diff. peak/hole / e Å <sup>-3</sup> | 0.68/-0.75                                                        |

2.  $^1\text{H}$  and  $^{13}\text{C}$  NMR spectra for compounds **3**, **6**, and **11**

$^1\text{H}$  NMR spectrum of **3a**

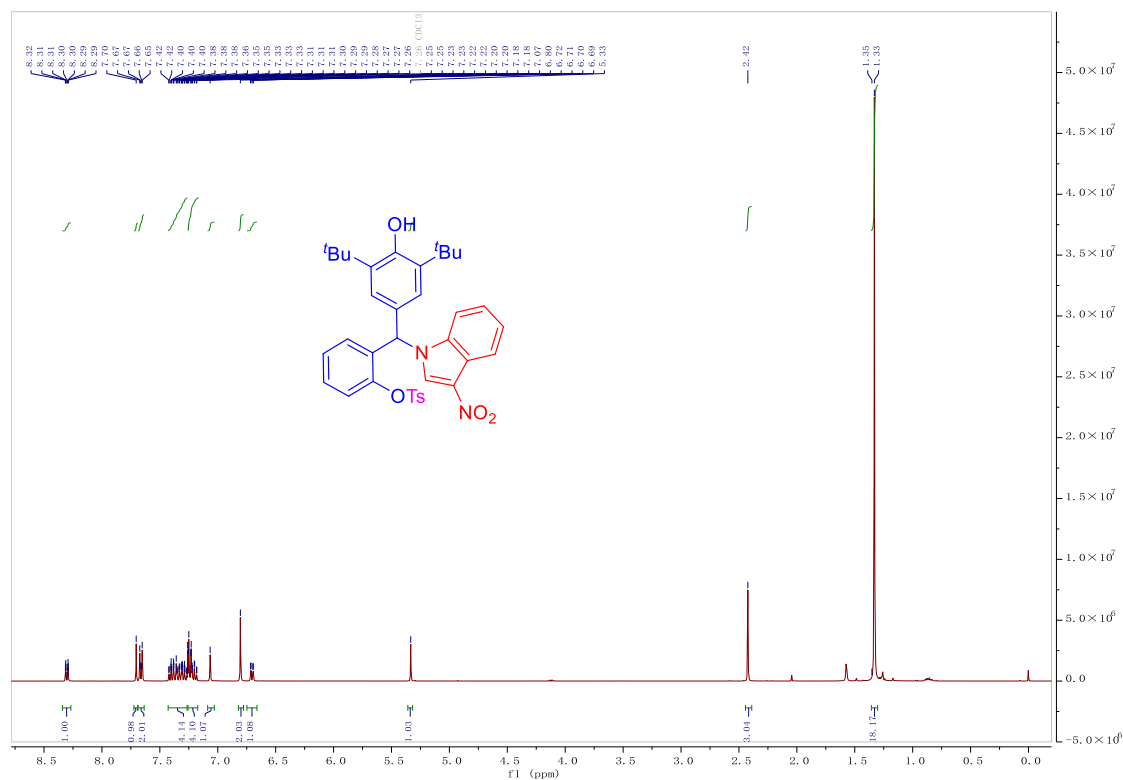

$^{13}\text{C}$  NMR spectrum of **3a**

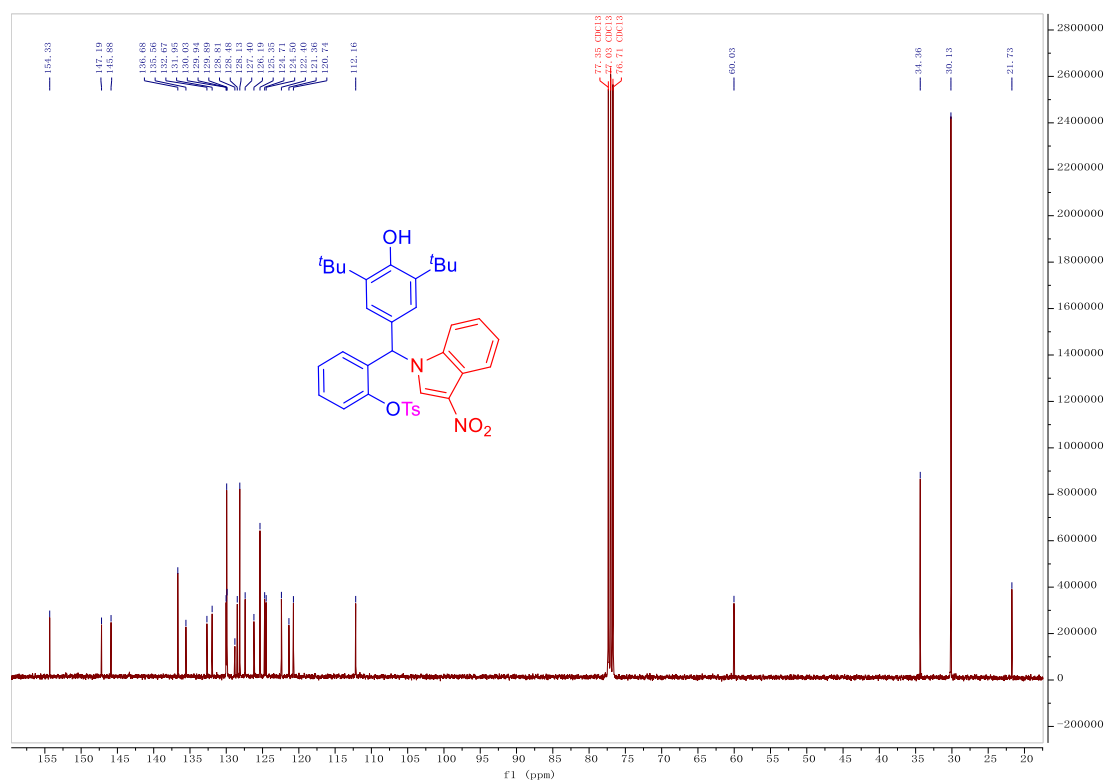

<sup>1</sup>H NMR spectrum of 3b

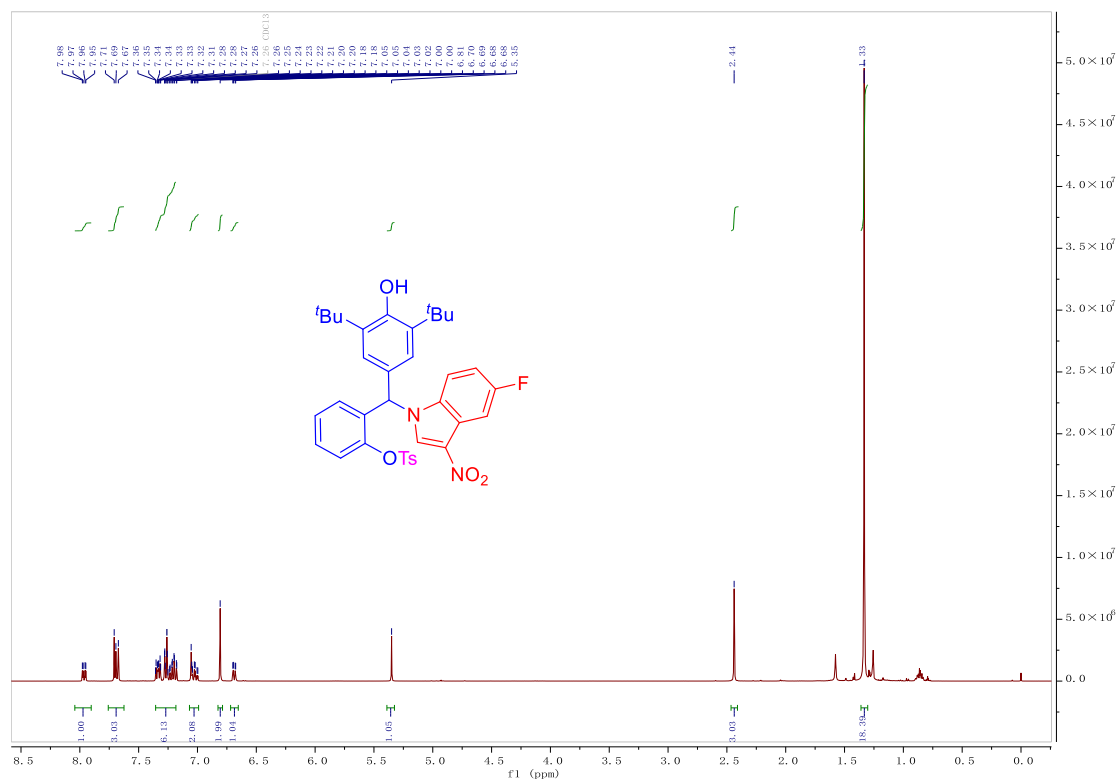

<sup>13</sup>C NMR spectrum of 3b

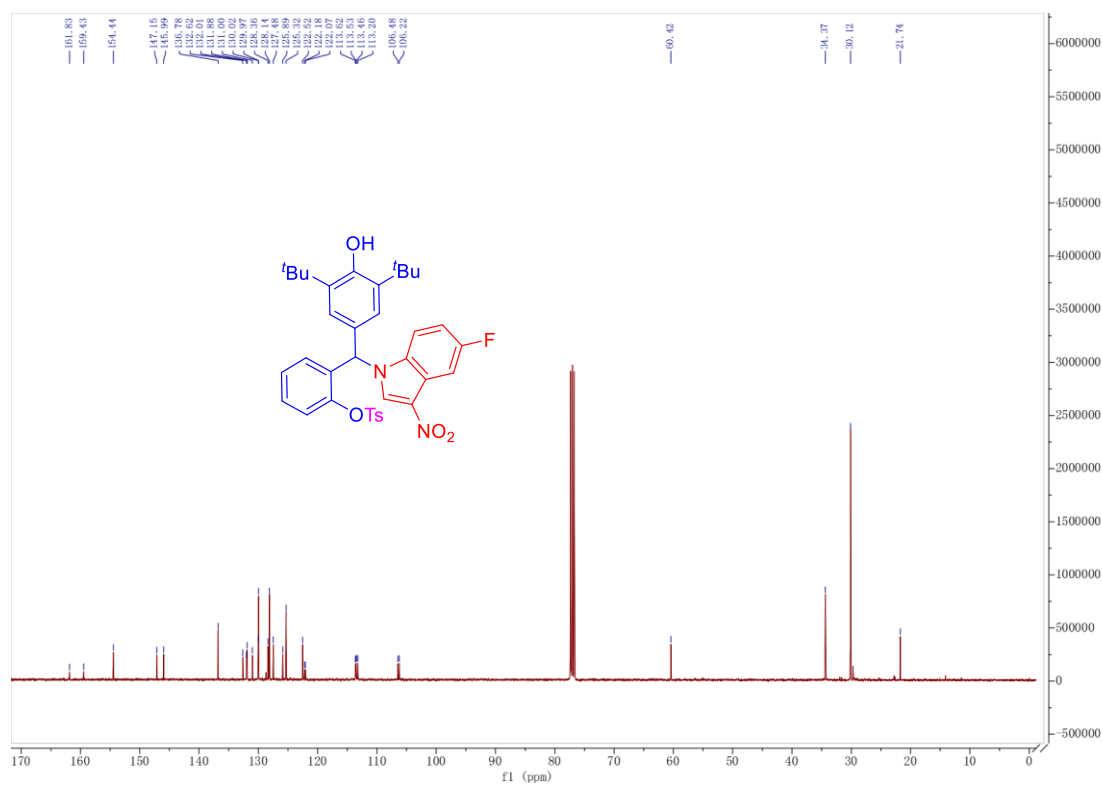

**<sup>1</sup>H NMR spectrum of 3c**

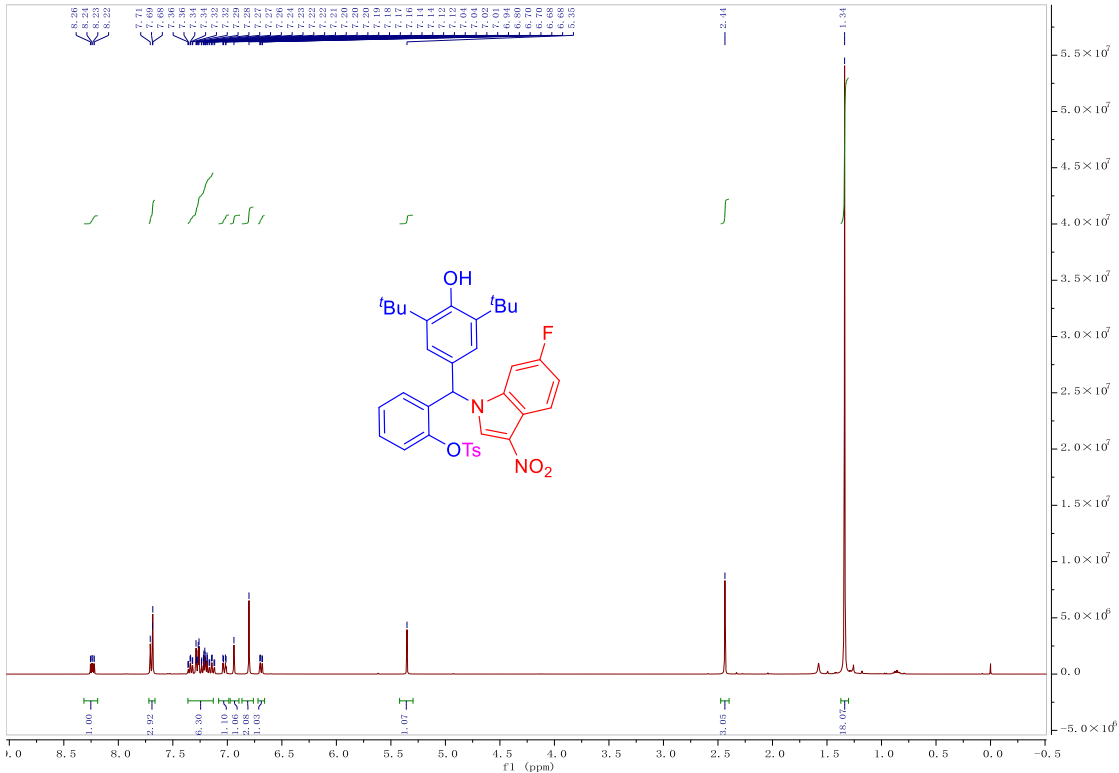

**$^{13}\text{C}$  NMR spectrum of 3c**

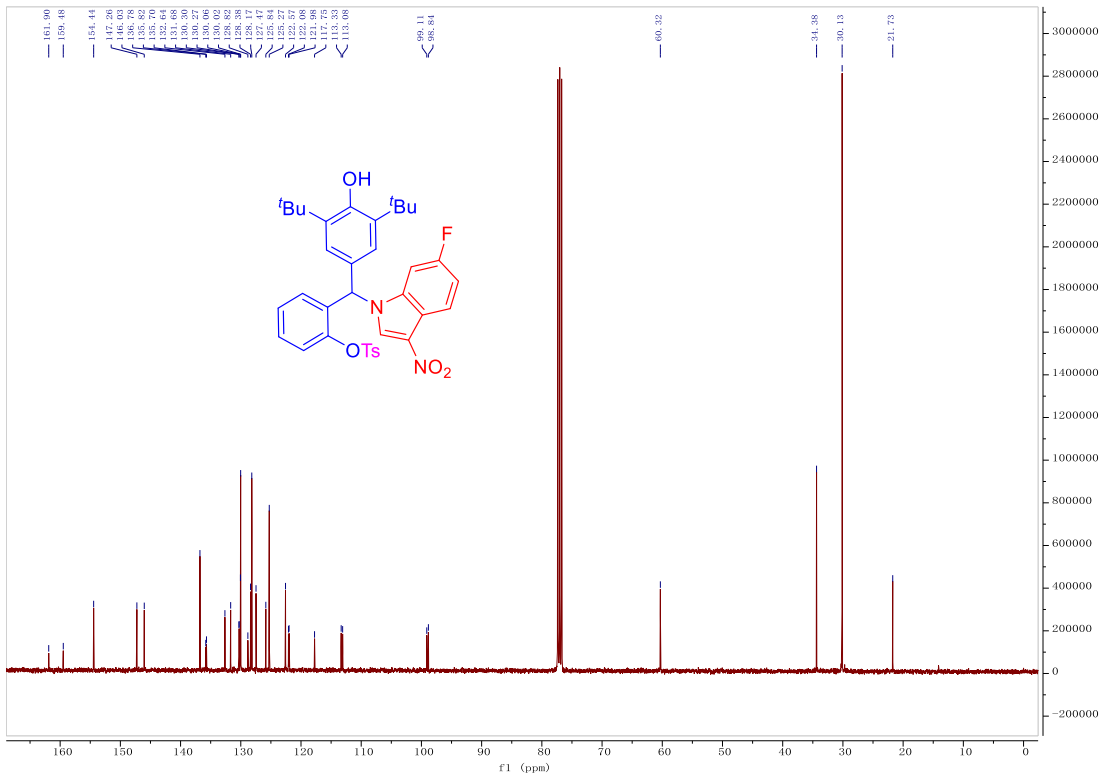

**$^1\text{H}$  NMR spectrum of 3d**

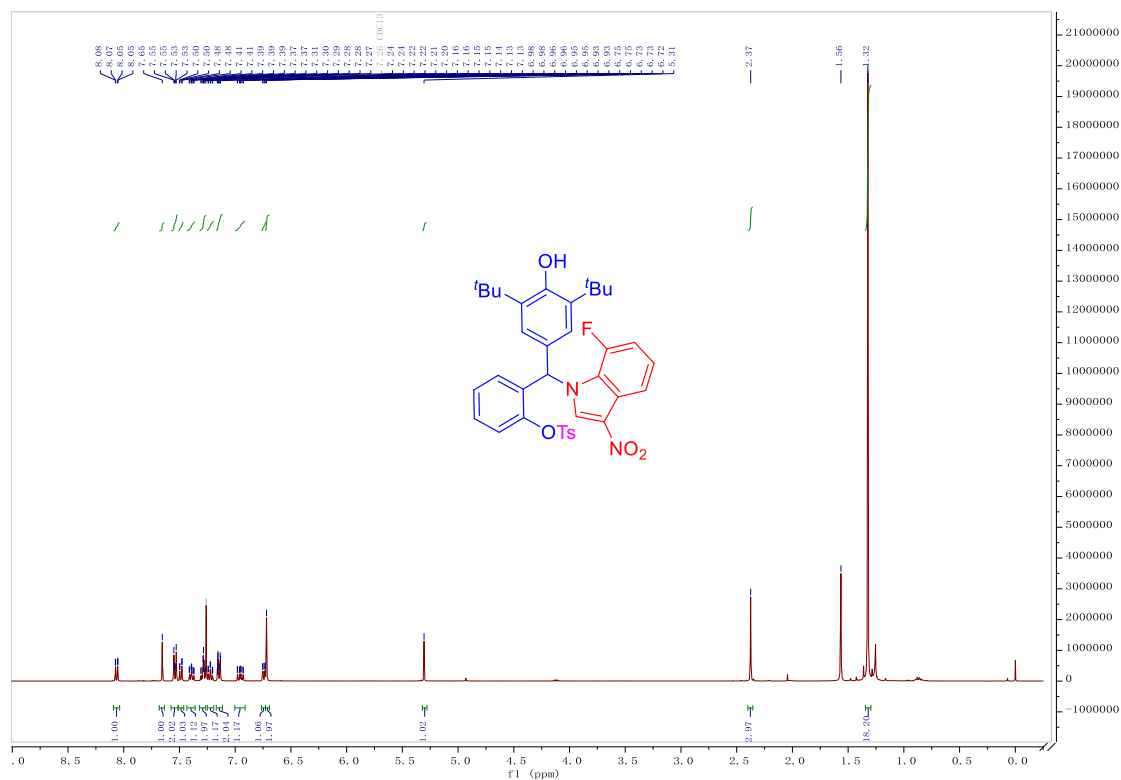

**$^{13}\text{C}$  NMR spectrum of 3d**

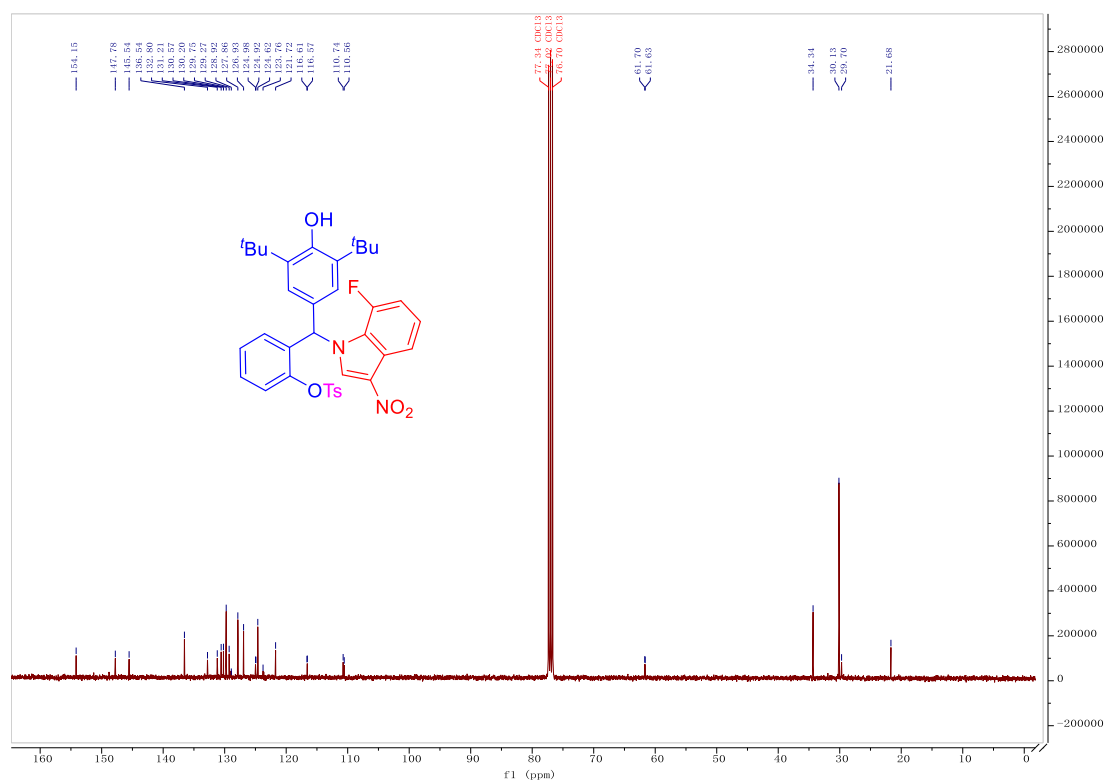

<sup>1</sup>H NMR spectrum of 3e

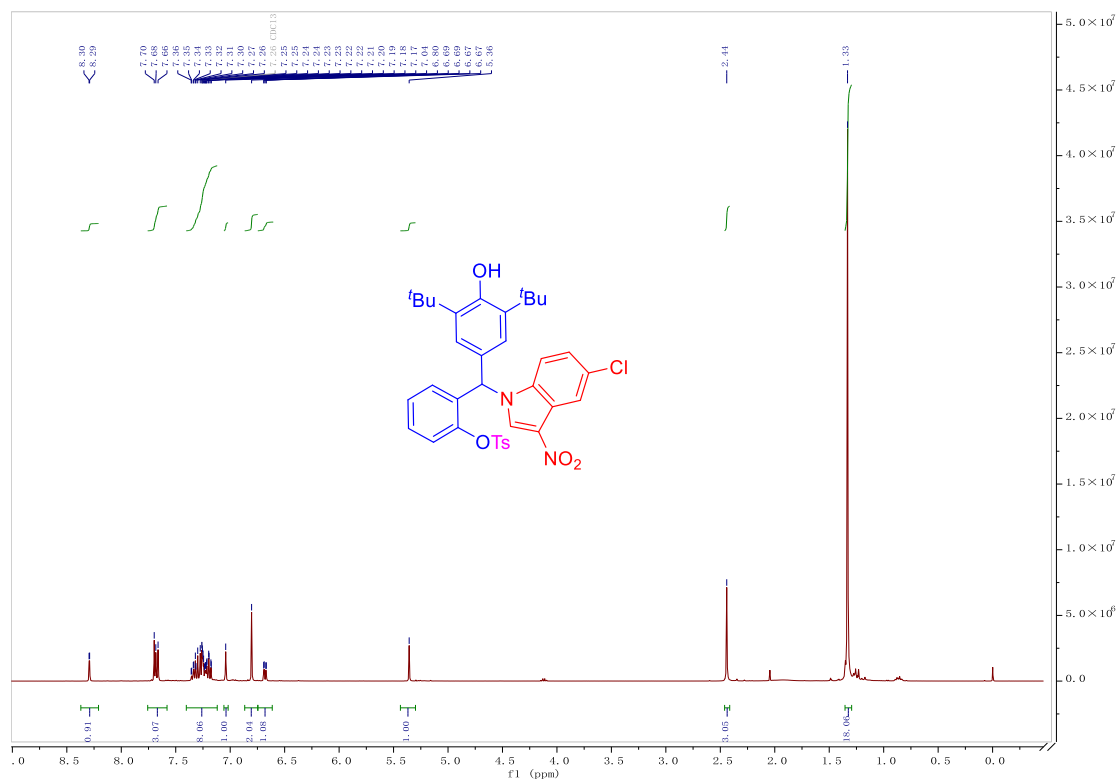

<sup>13</sup>C NMR spectrum of 3e

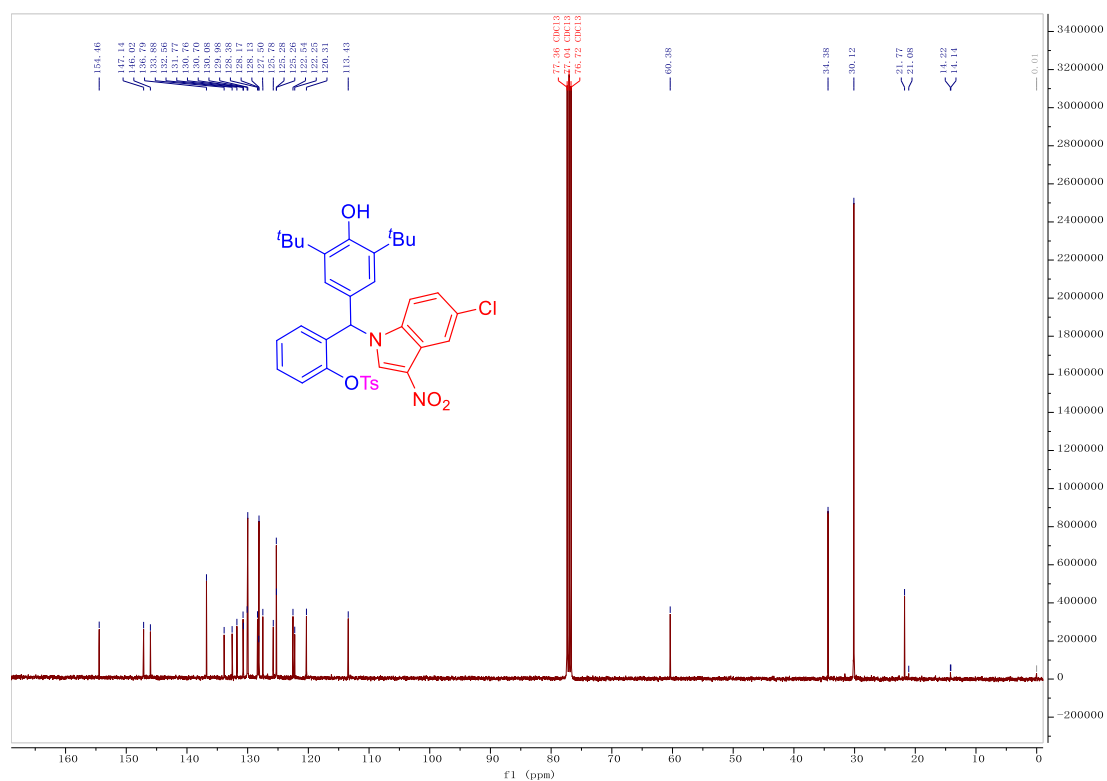



**<sup>1</sup>H NMR spectrum of 3f**

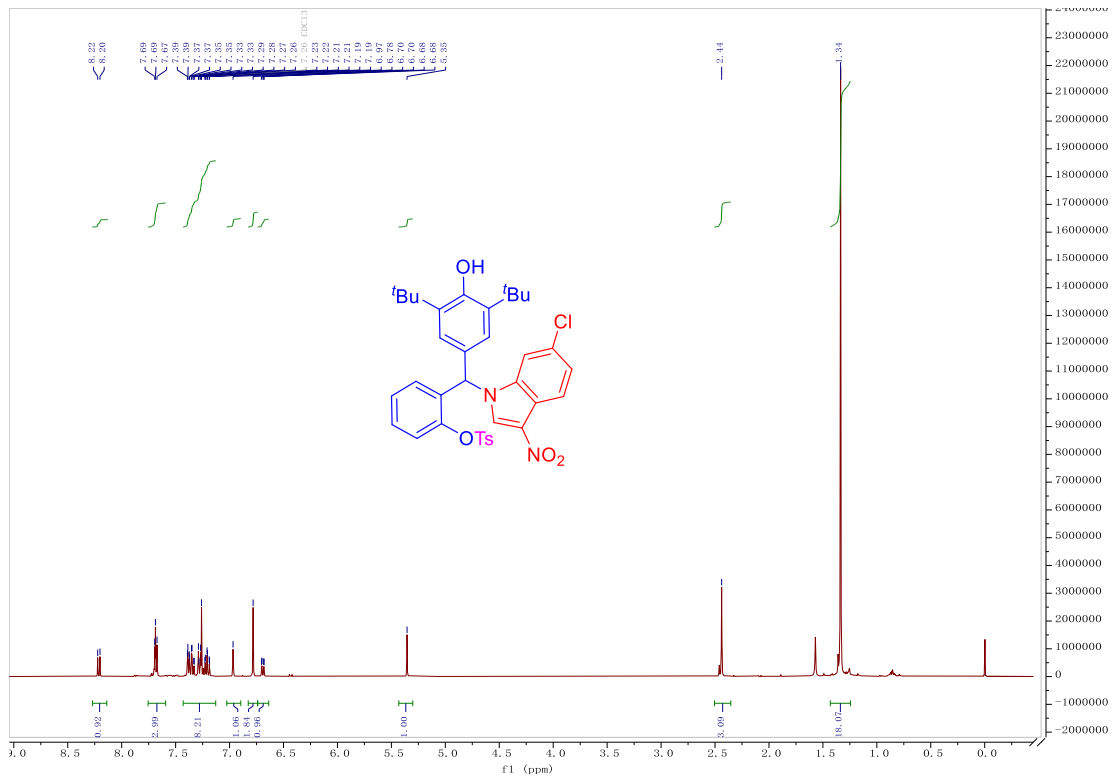

**$^{13}\text{C}$  NMR spectrum of 3f**

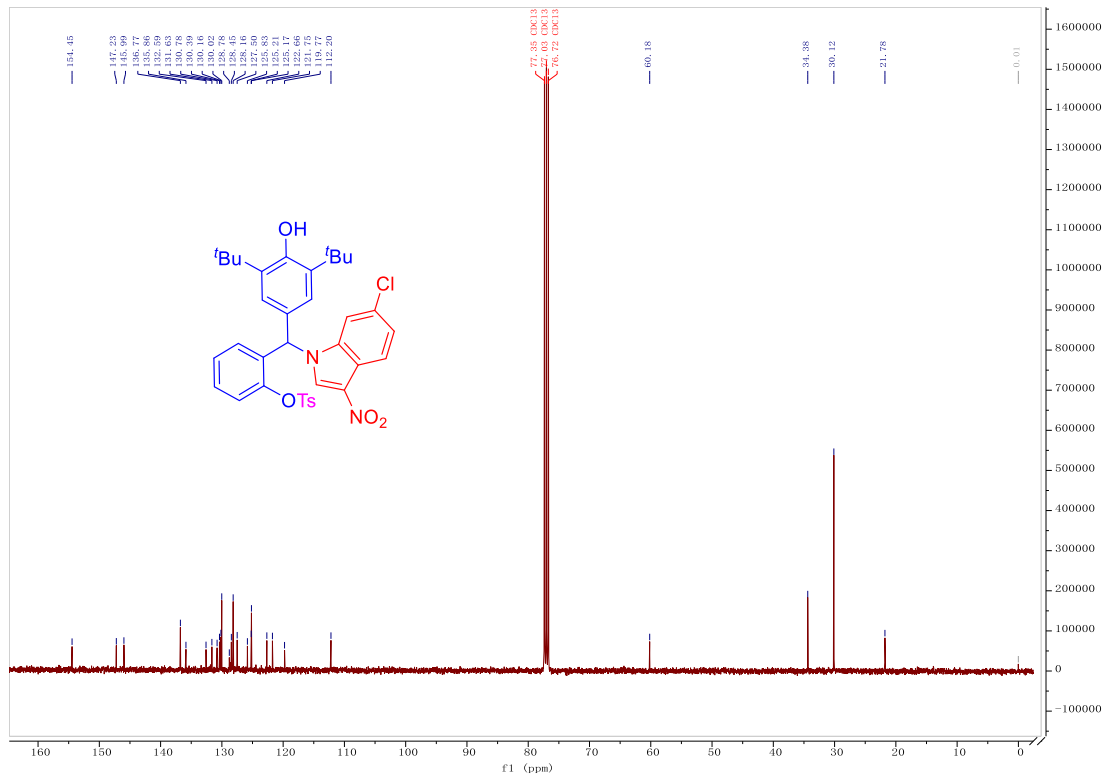

**<sup>1</sup>H NMR spectrum of 3g**

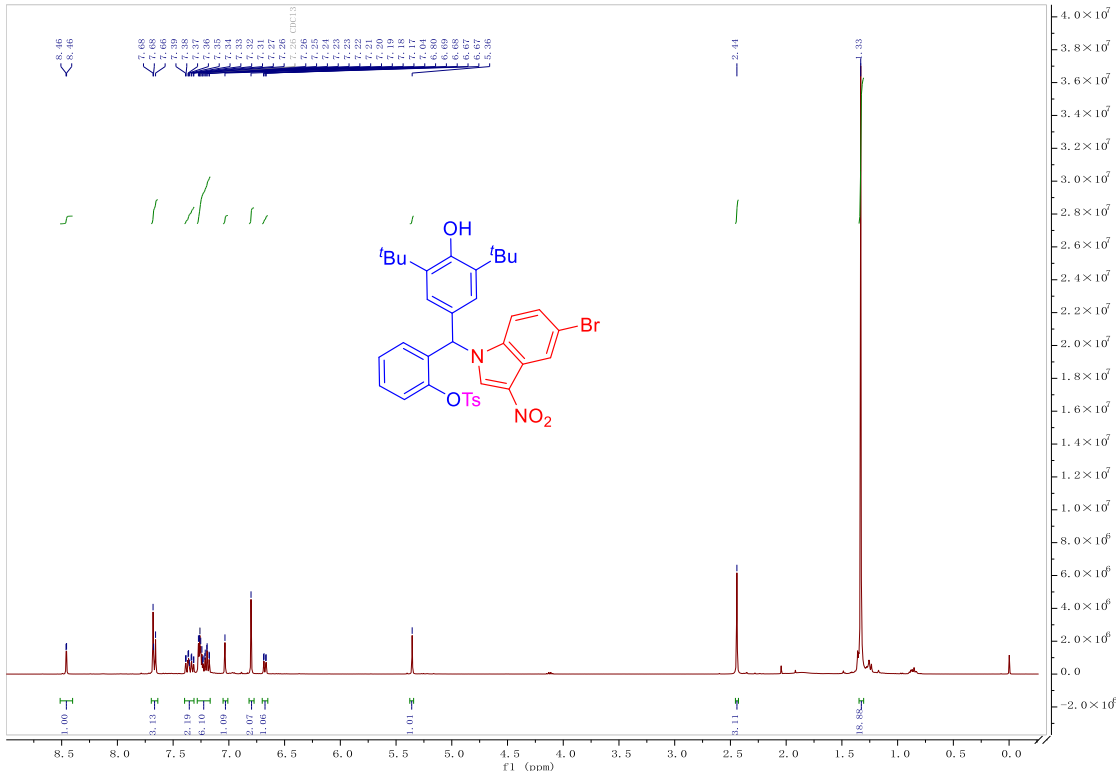

**$^{13}\text{C}$  NMR spectrum of 3g**

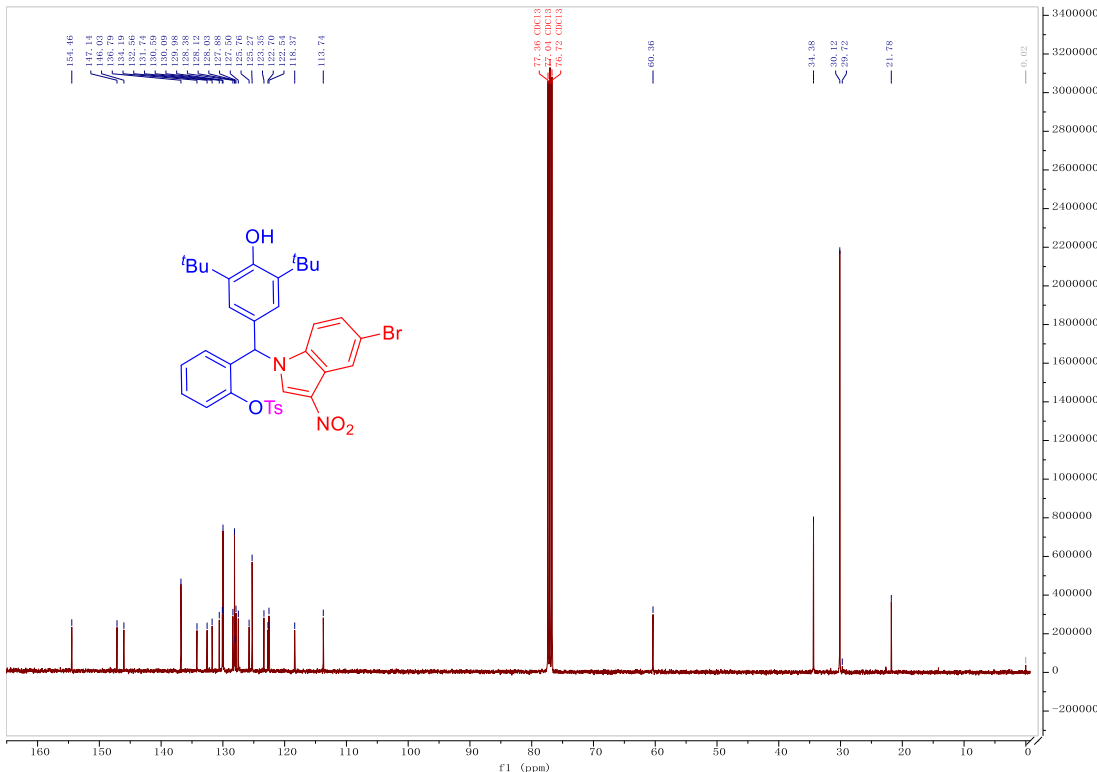

<sup>1</sup>H NMR spectrum of 3h

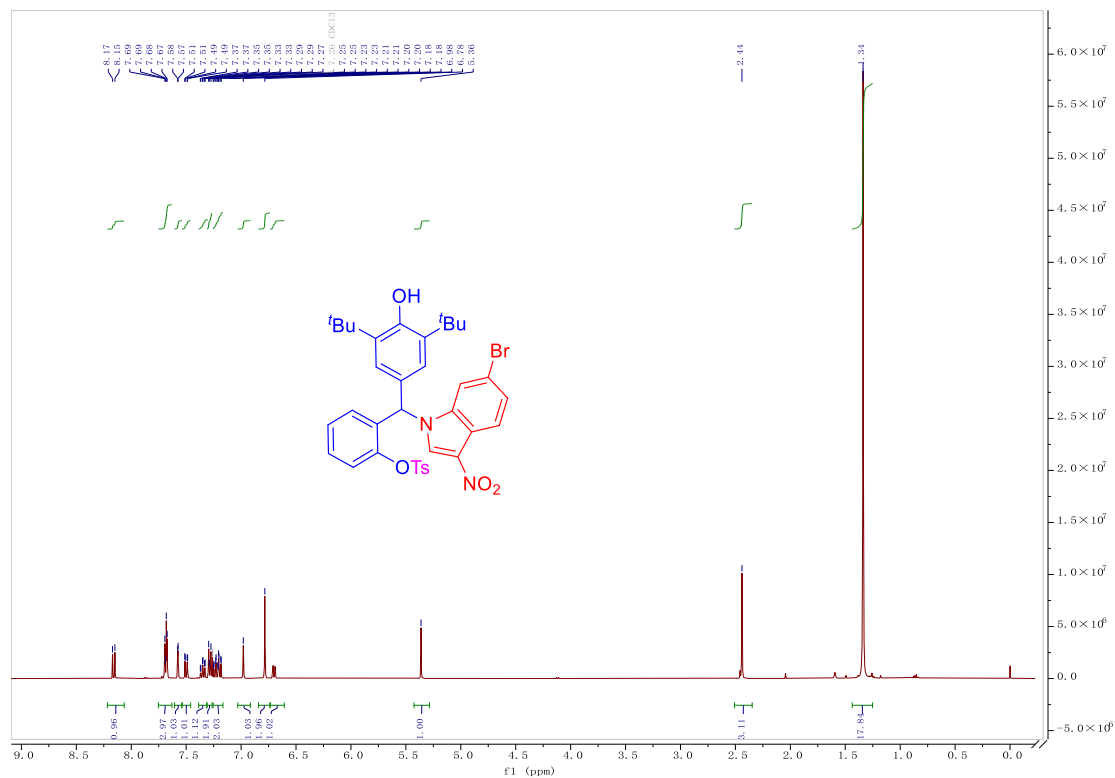

<sup>13</sup>C NMR spectrum of 3h

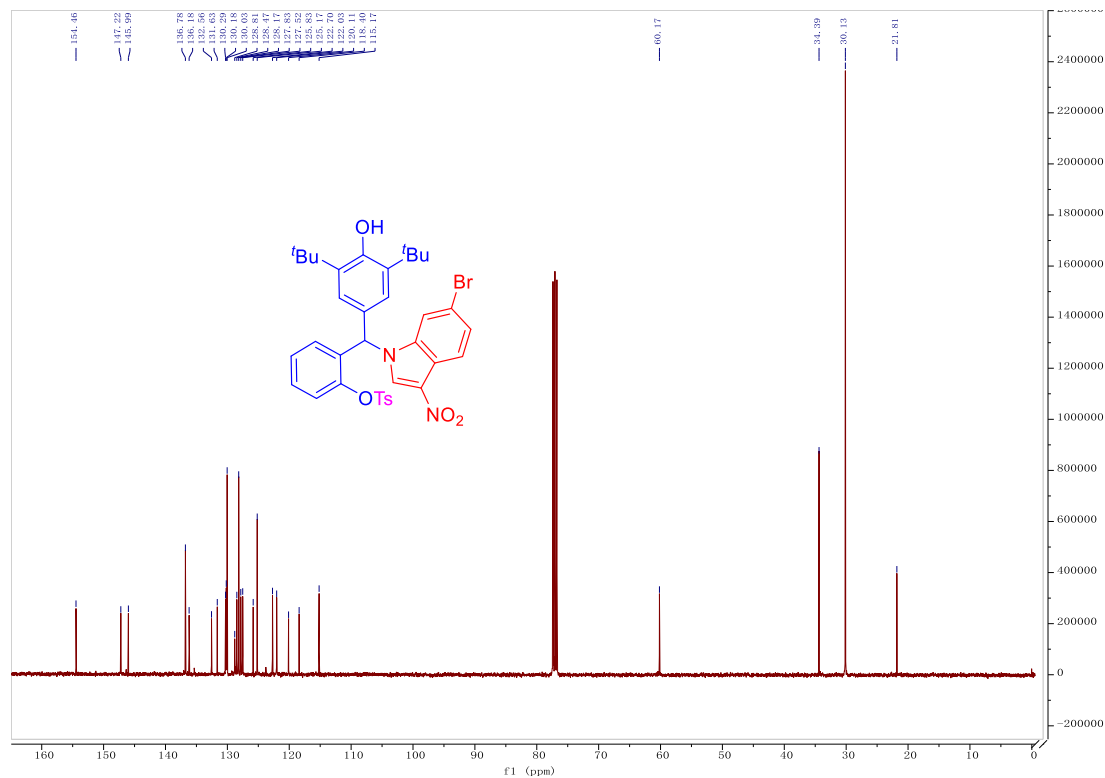

**$^1\text{H}$  NMR spectrum of 3i**

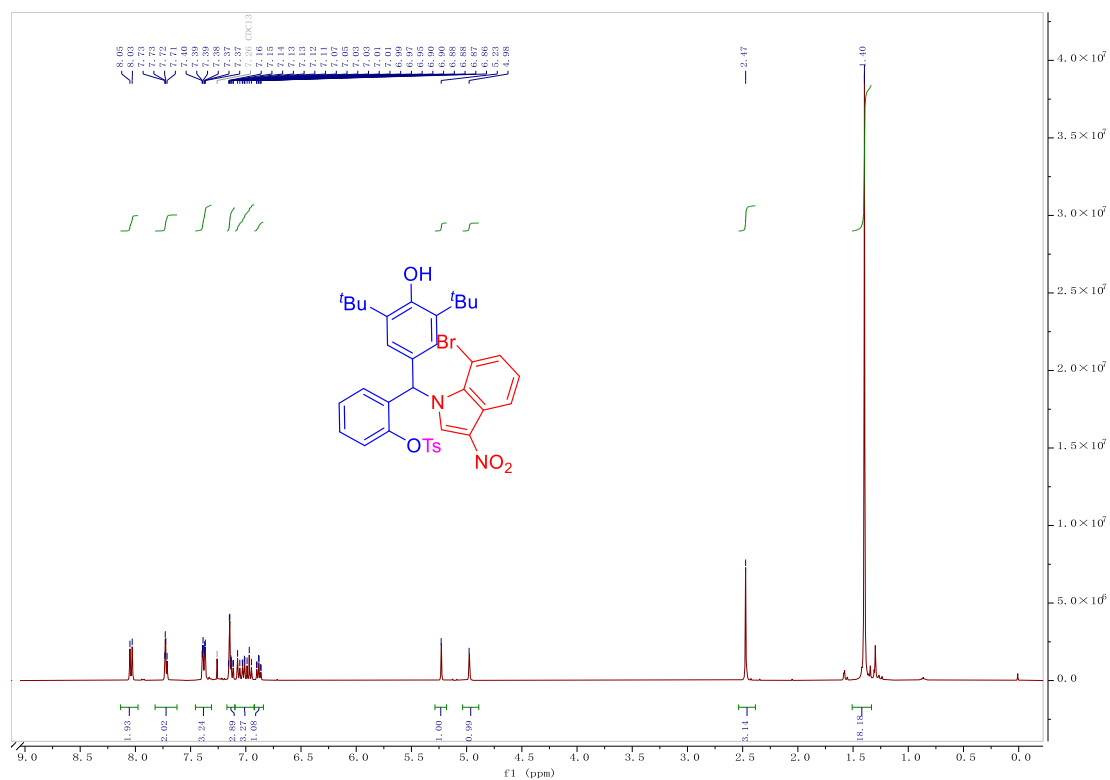

**$^{13}\text{C}$  NMR spectrum of 3i**

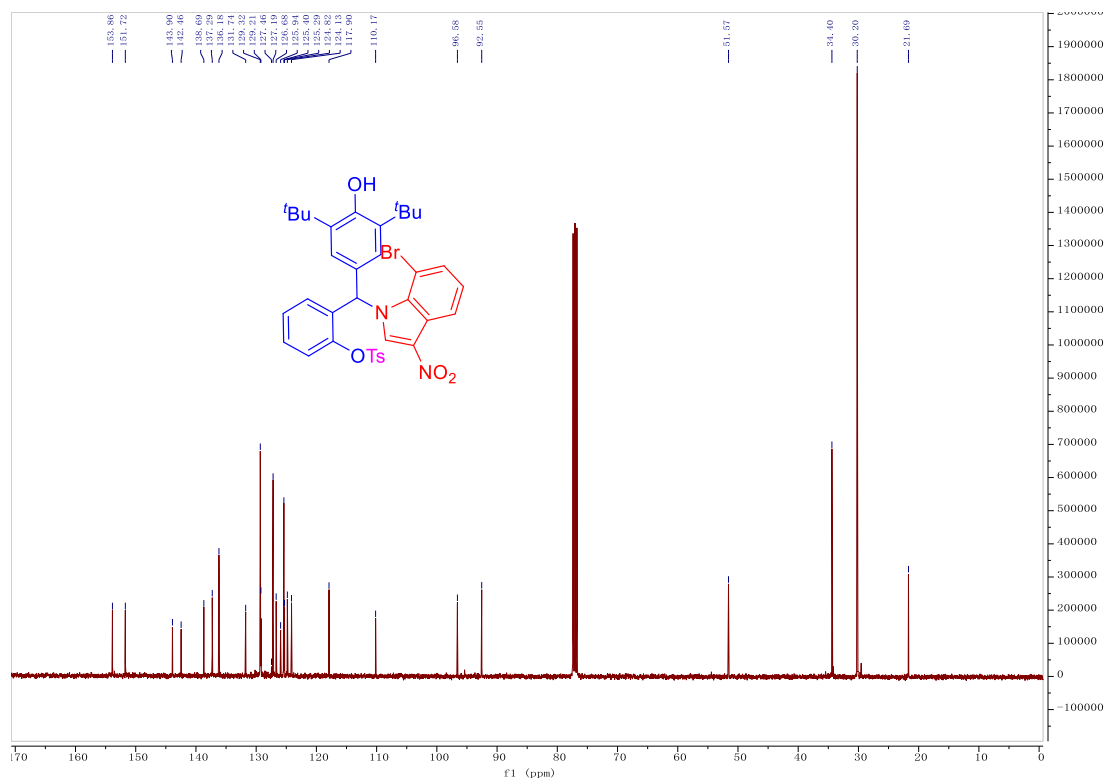

**<sup>1</sup>H NMR spectrum of 3j**

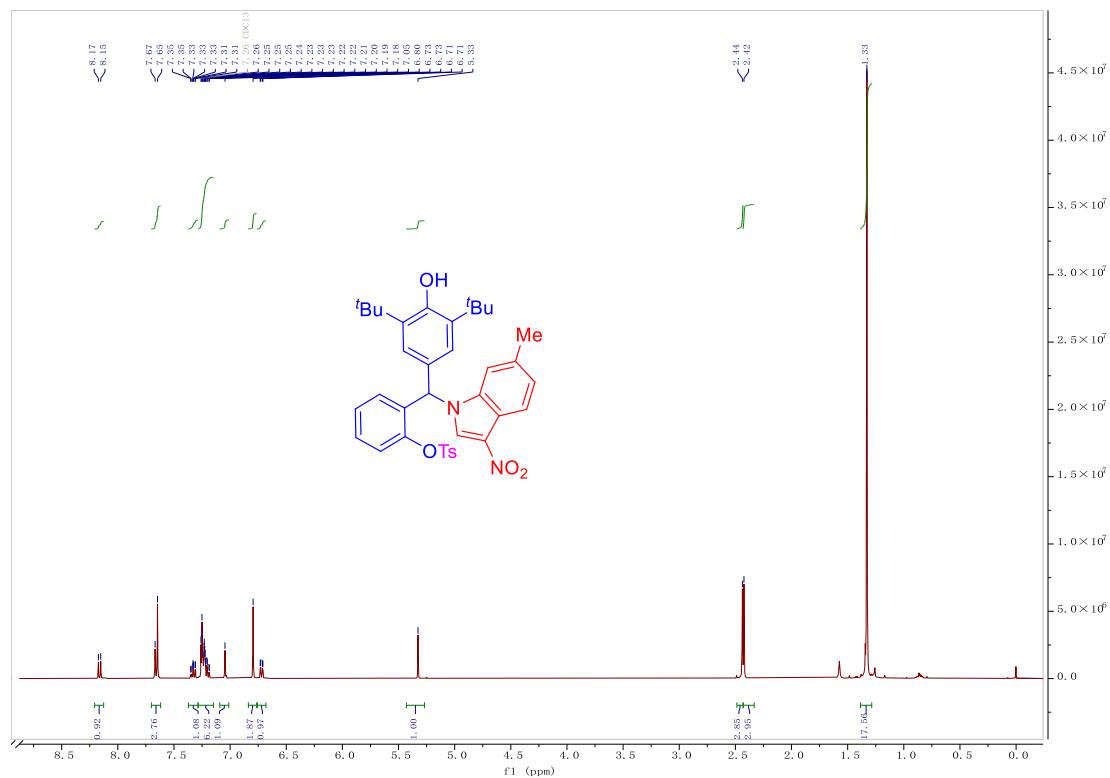

**<sup>13</sup>C NMR spectrum of 3j**

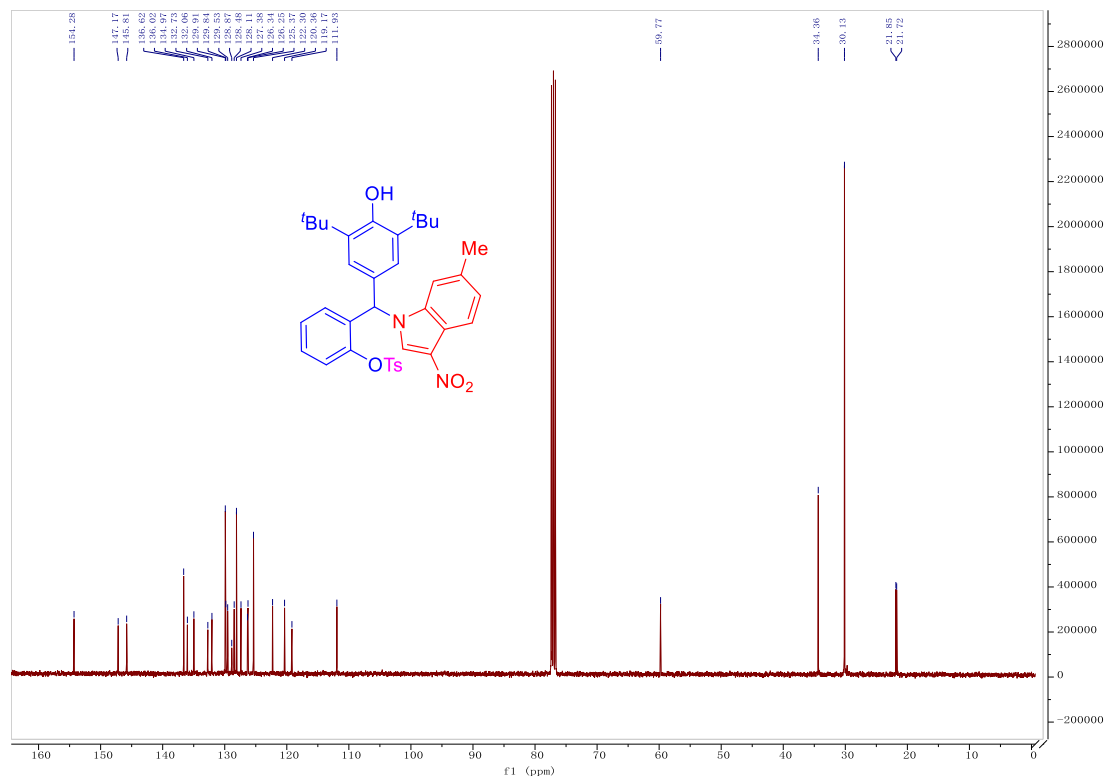

<sup>1</sup>H NMR spectrum of 3k

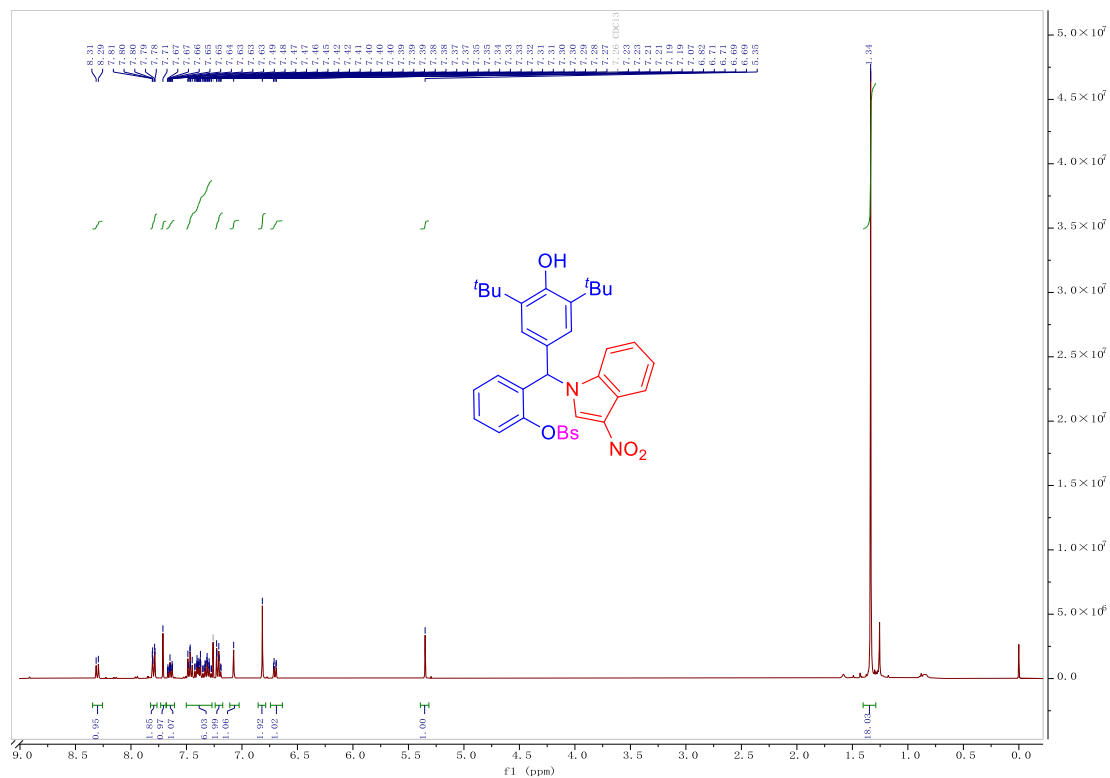

<sup>13</sup>C NMR spectrum of 3k

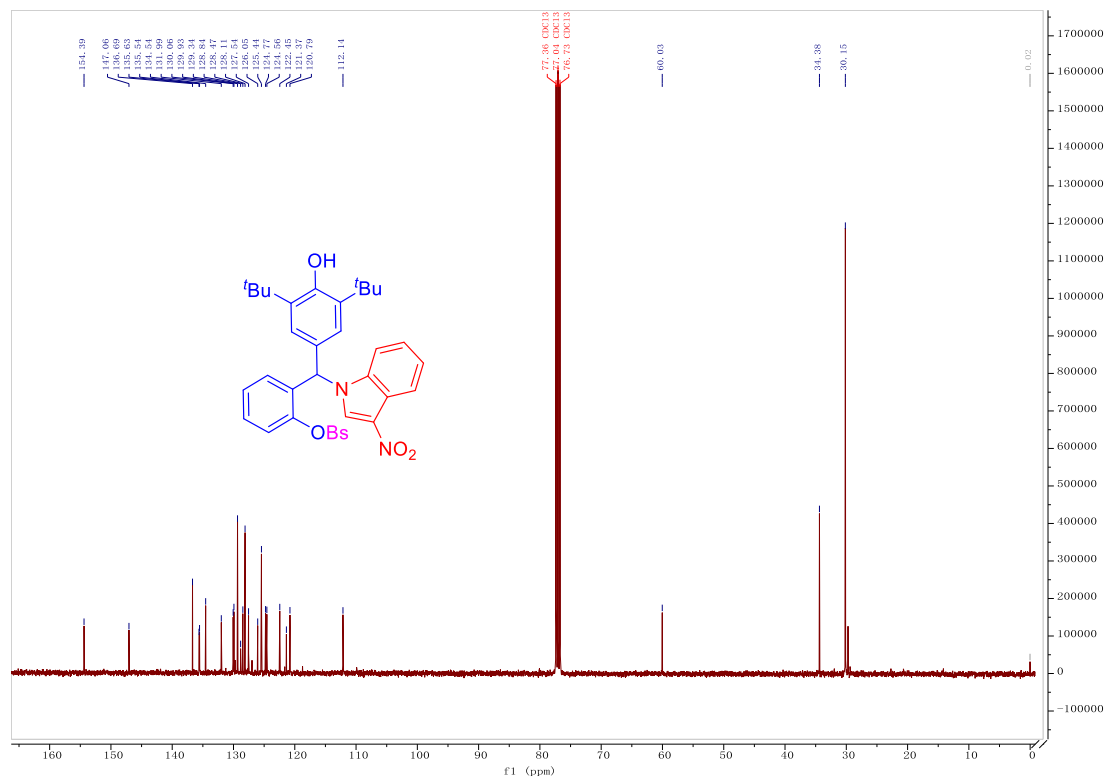

**<sup>1</sup>H NMR spectrum of 3l**

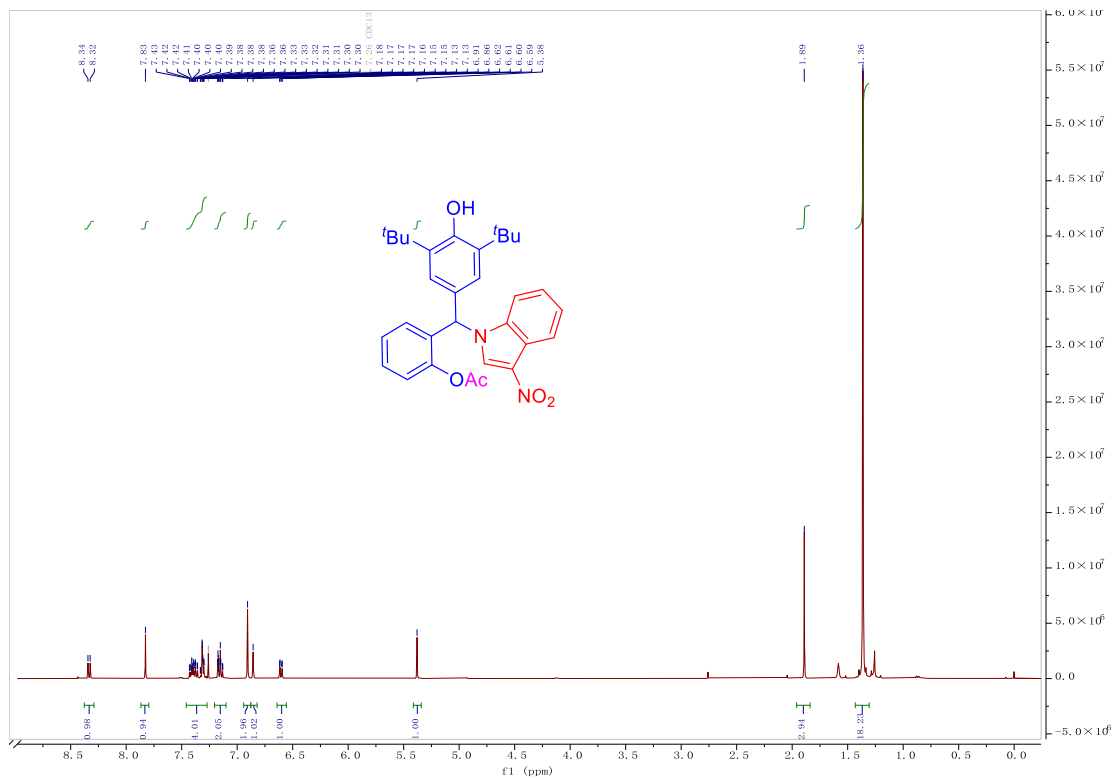

**$^{13}\text{C}$  NMR spectrum of 3l**

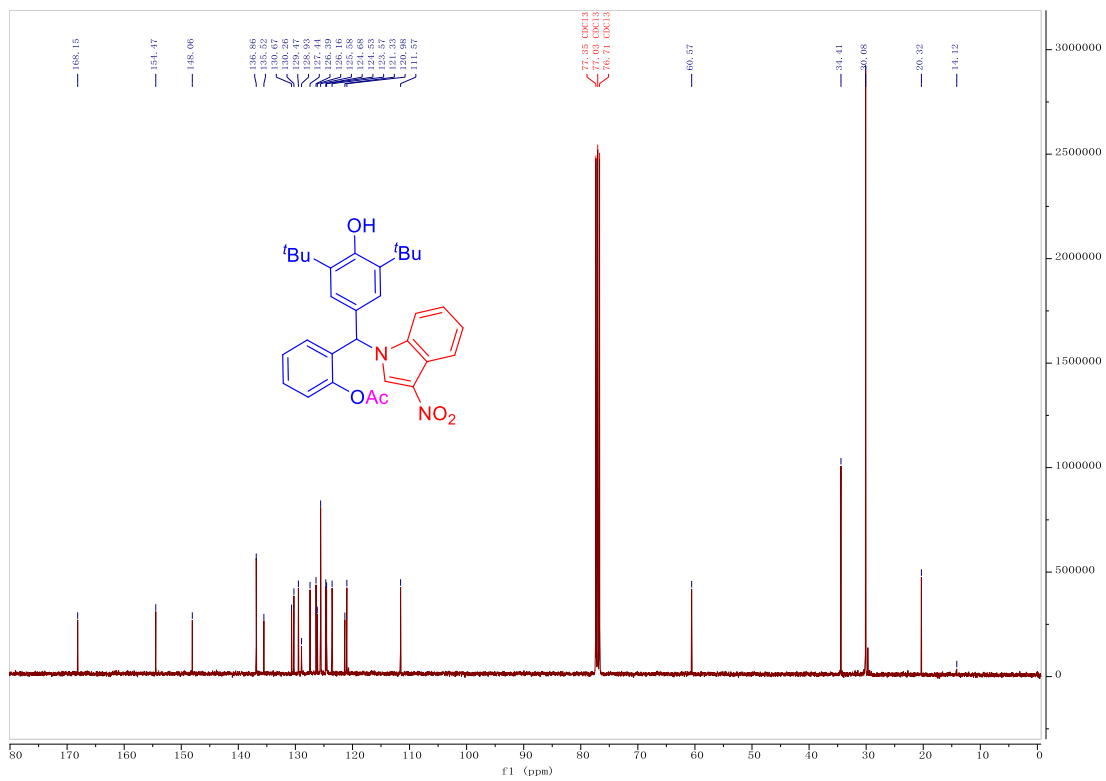

**<sup>1</sup>H NMR spectrum of 3m**

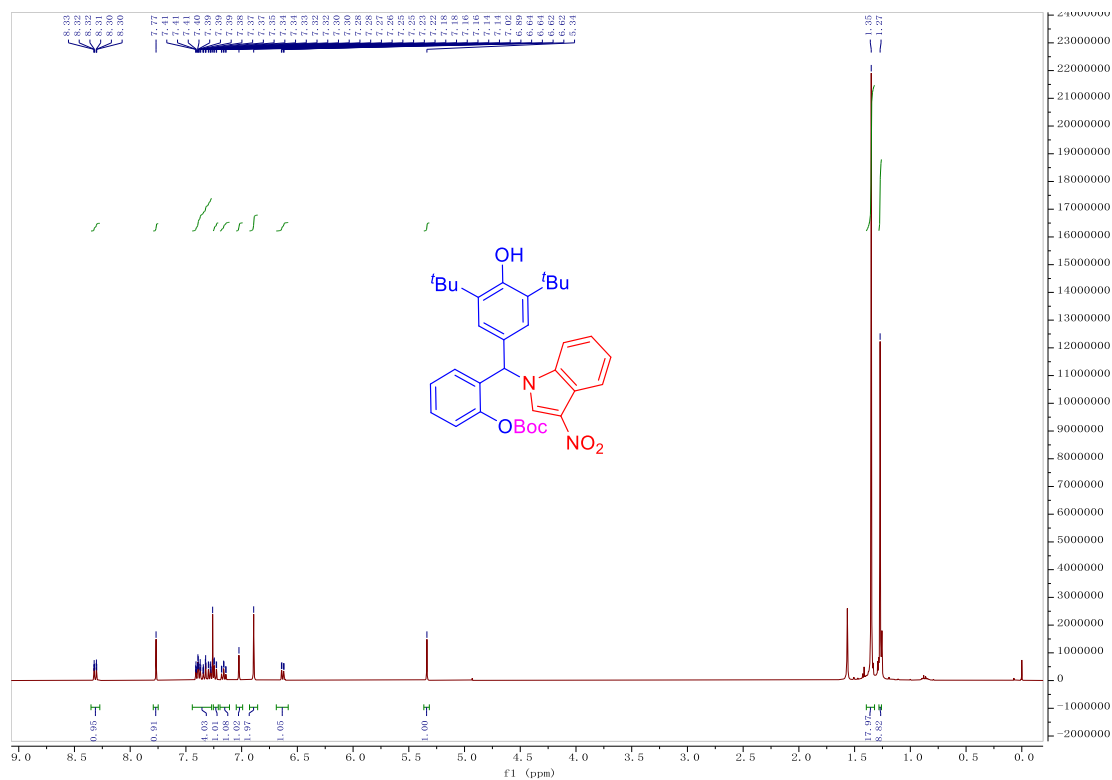

**<sup>13</sup>C NMR spectrum of 3m**

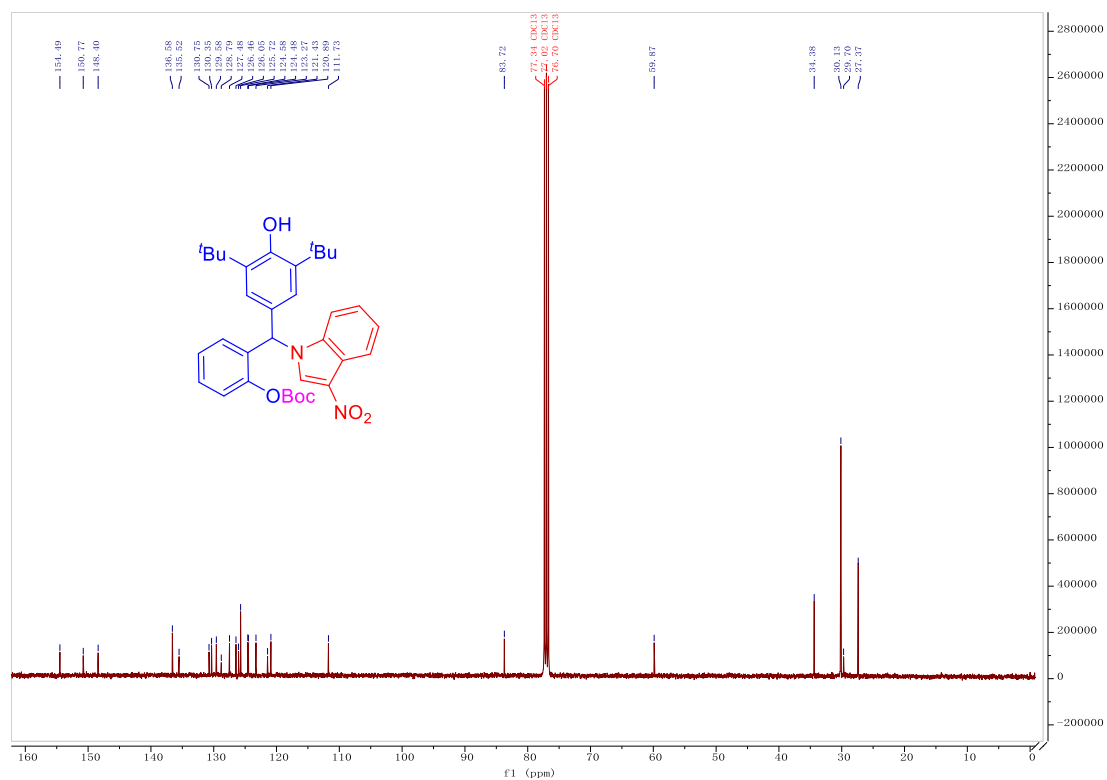



**<sup>1</sup>H NMR spectrum of 3n**

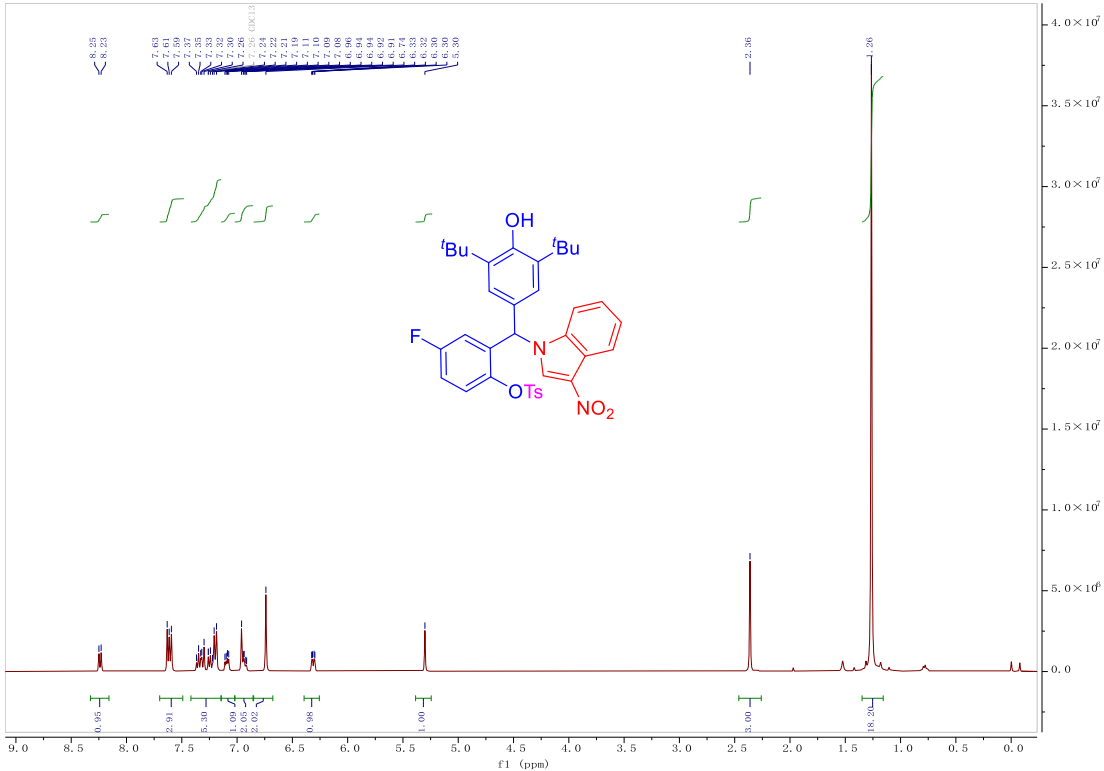<sup>13</sup>C NMR spectrum of 3n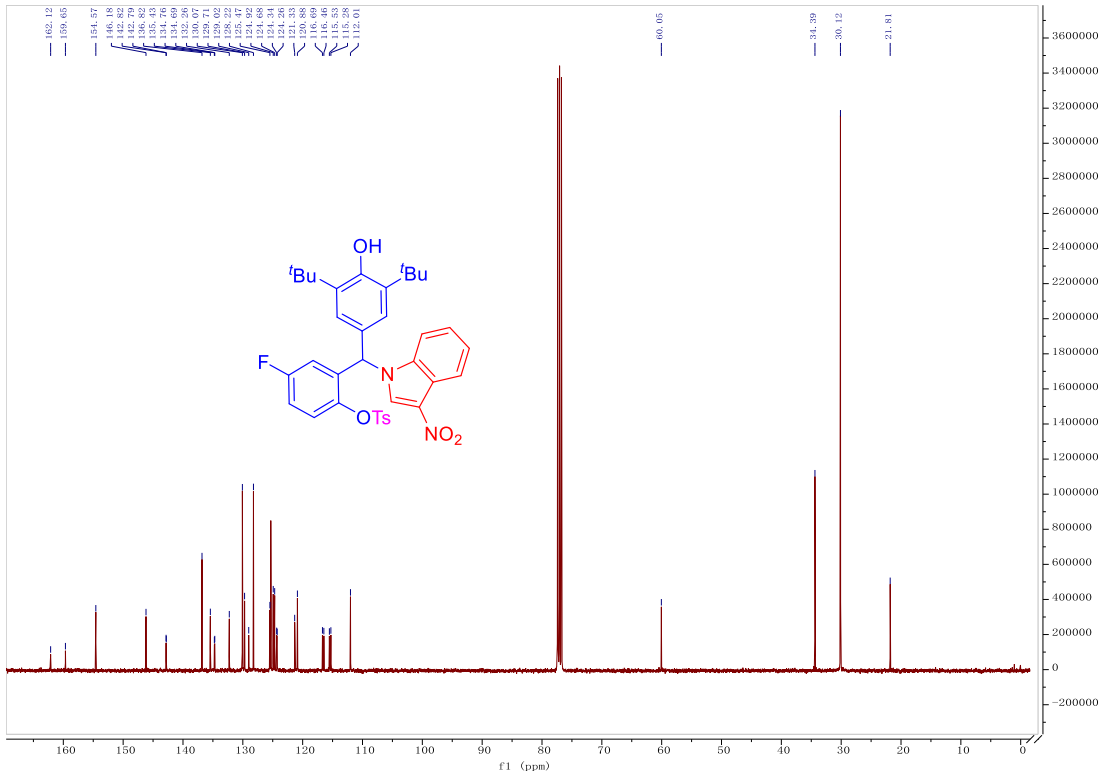

**$^1\text{H}$  NMR spectrum of 3o**

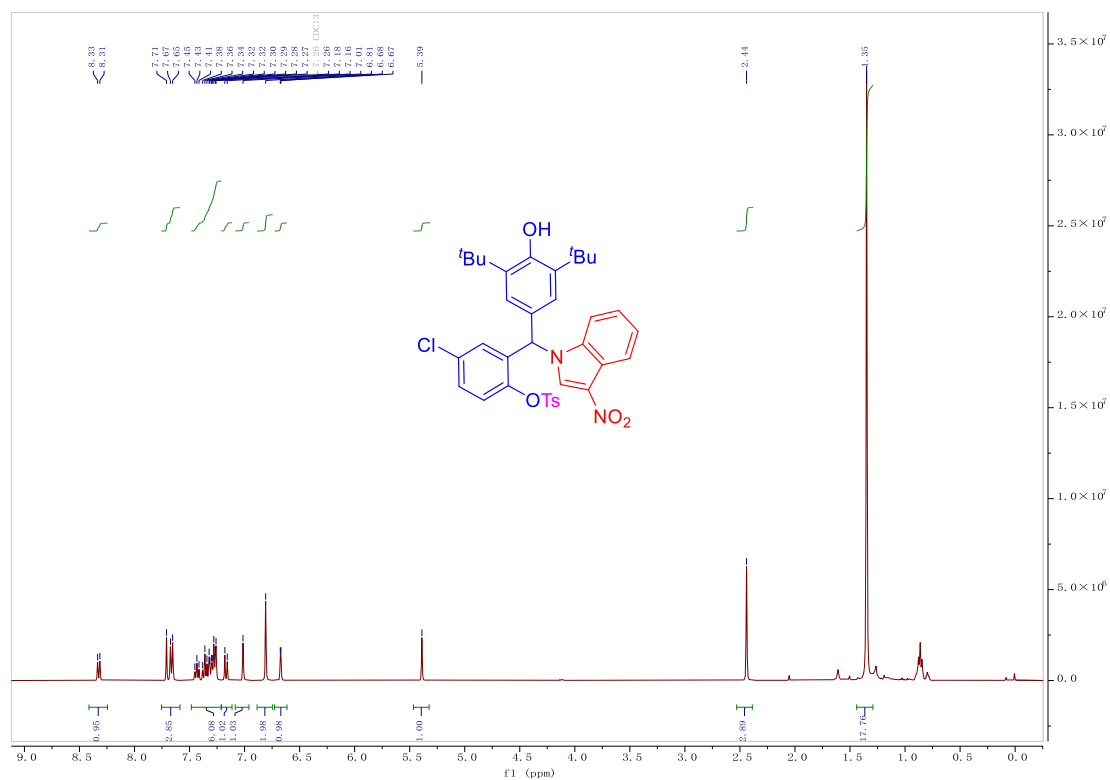

**$^{13}\text{C}$  NMR spectrum of 3o**

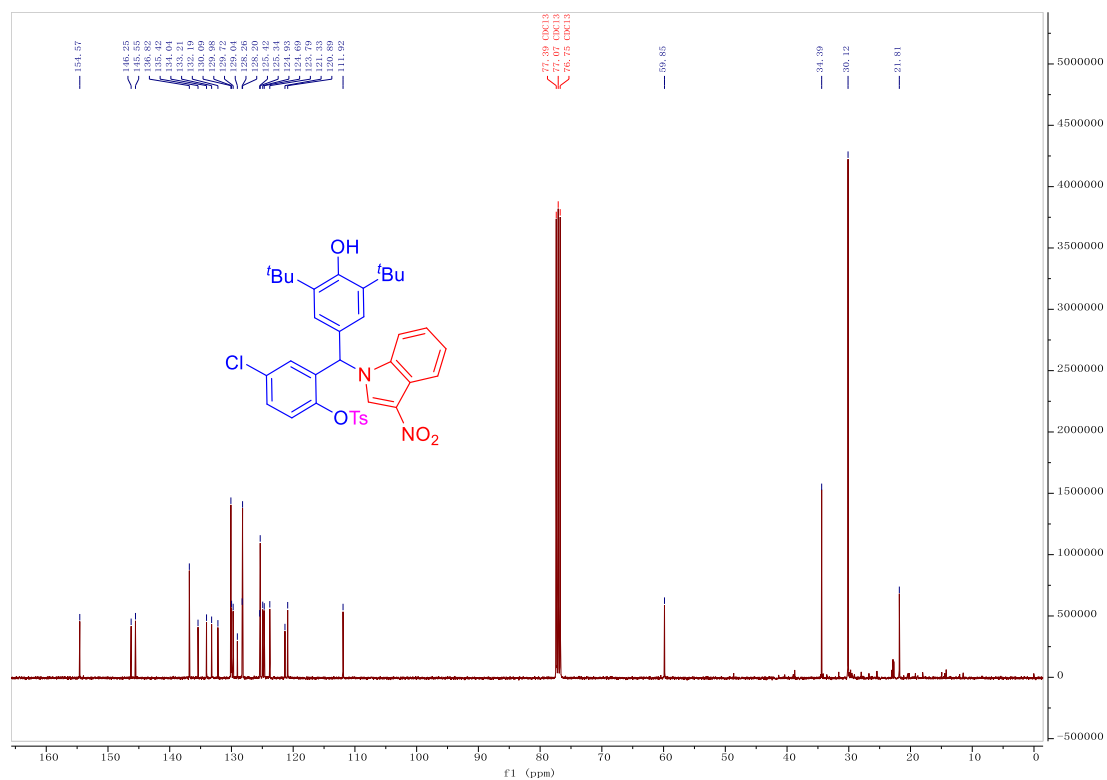

**$^1\text{H}$  NMR spectrum of 3p**

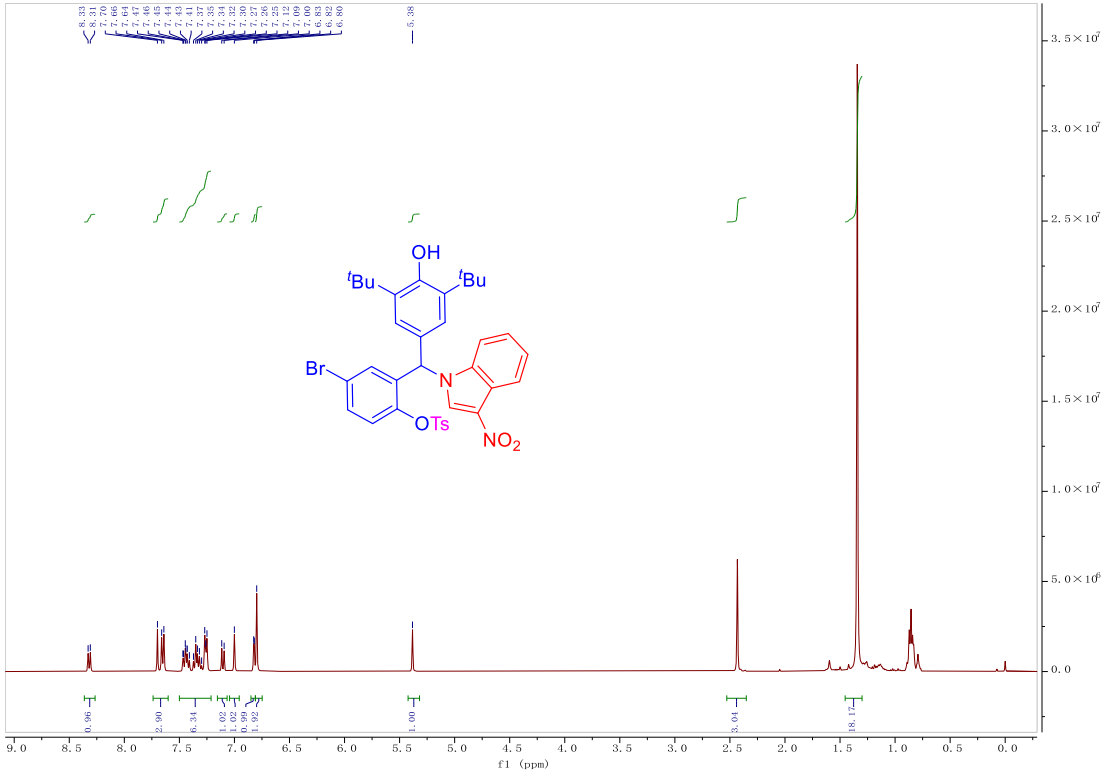

**$^{13}\text{C}$  NMR spectrum of 3p**

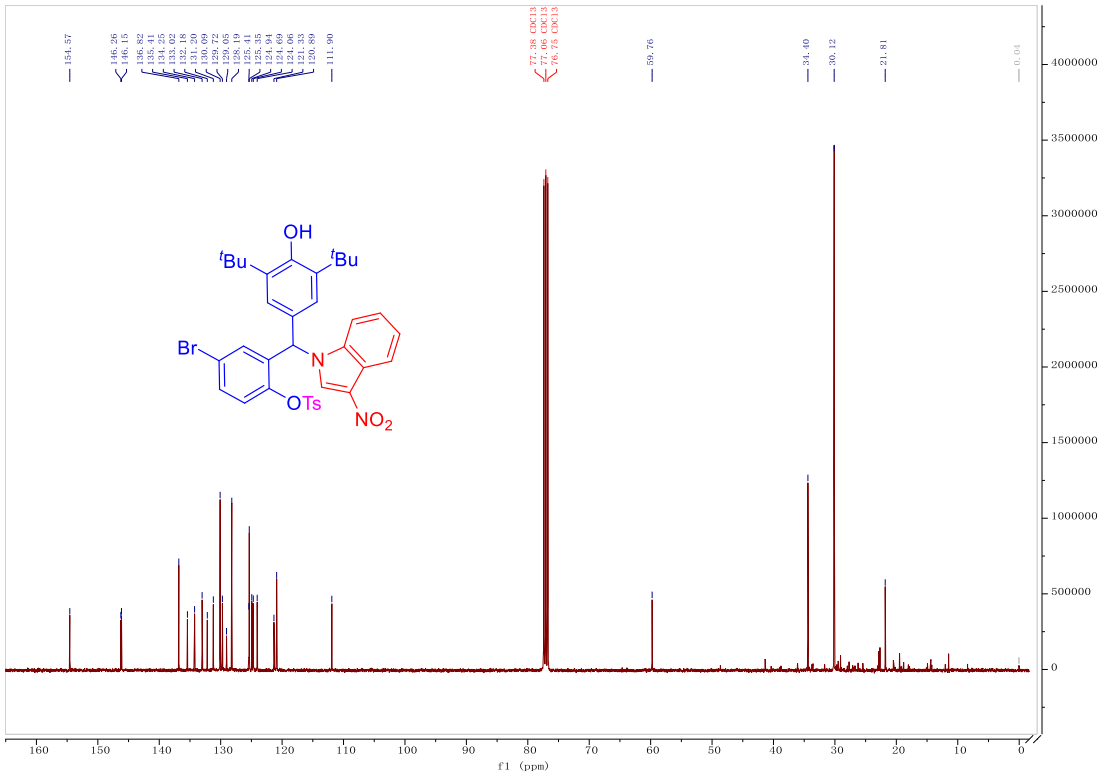

**<sup>1</sup>H NMR spectrum of 3q**

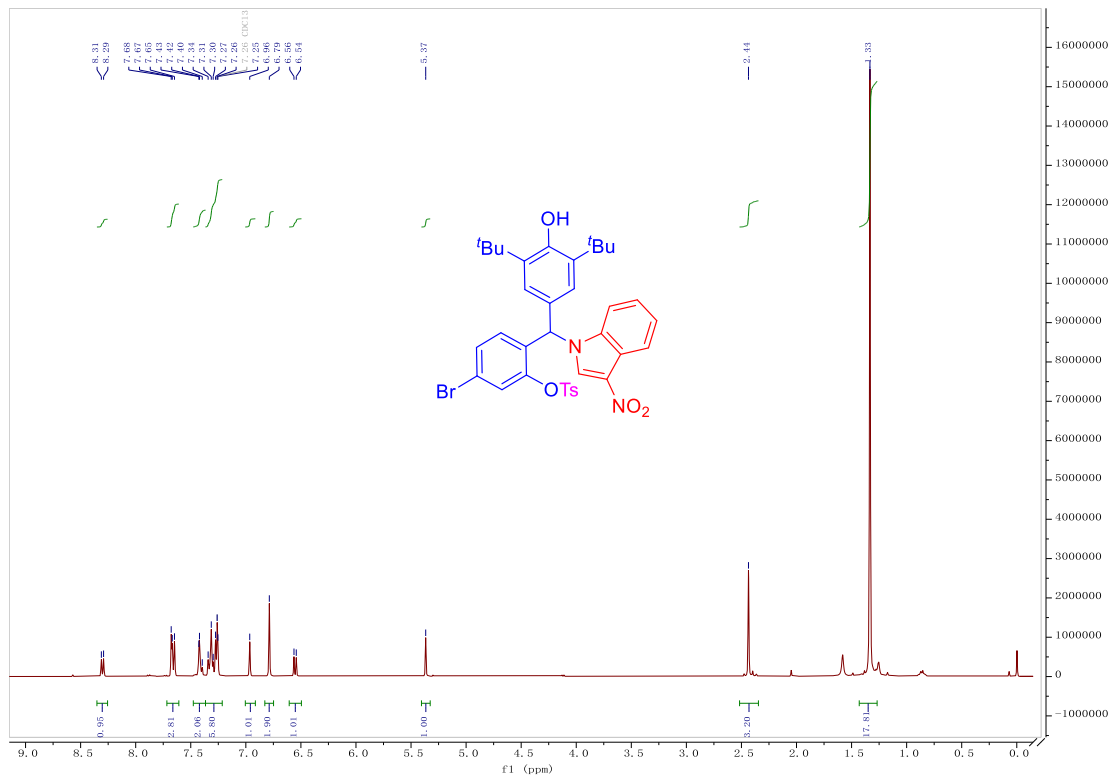

**$^{13}\text{C}$  NMR spectrum of 3q**

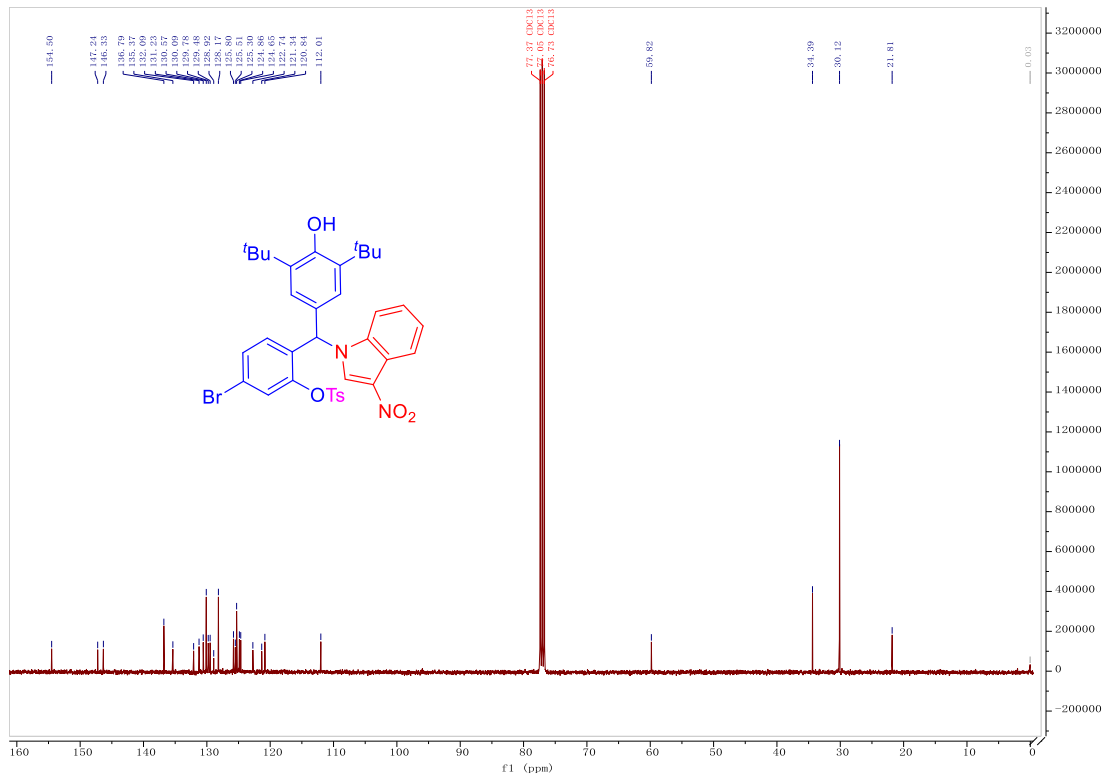

**<sup>1</sup>H NMR spectrum of 3r**

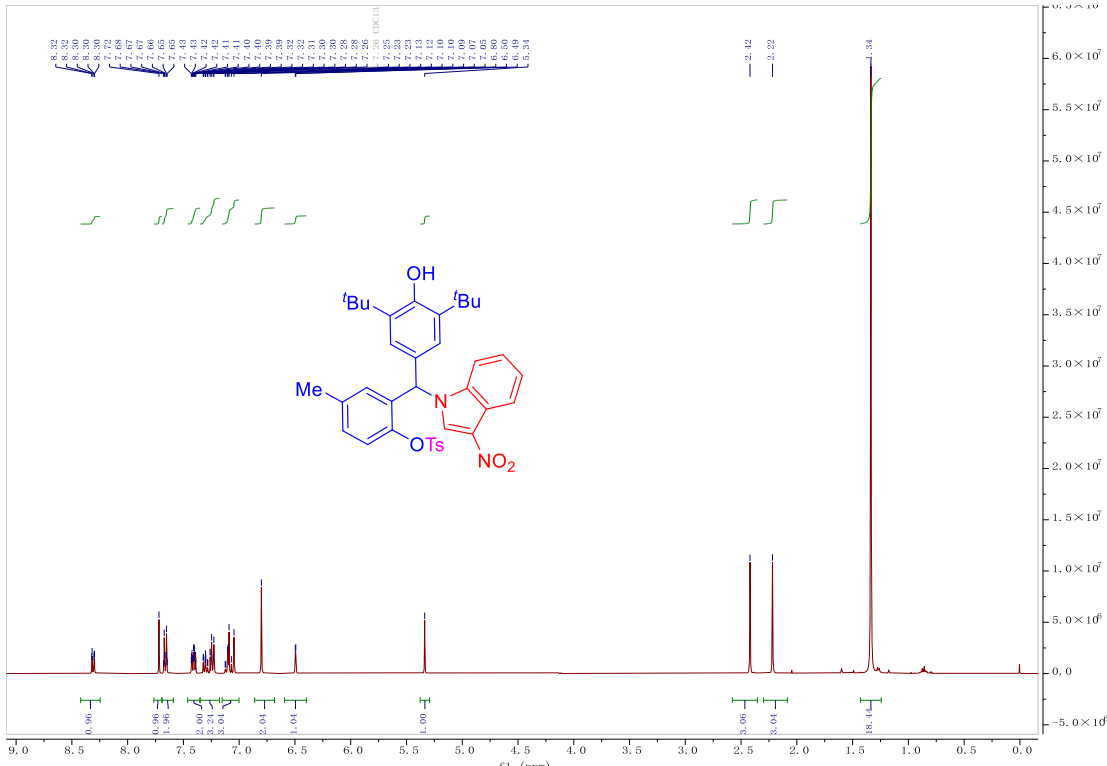

**$^{13}\text{C}$  NMR spectrum of 3r**

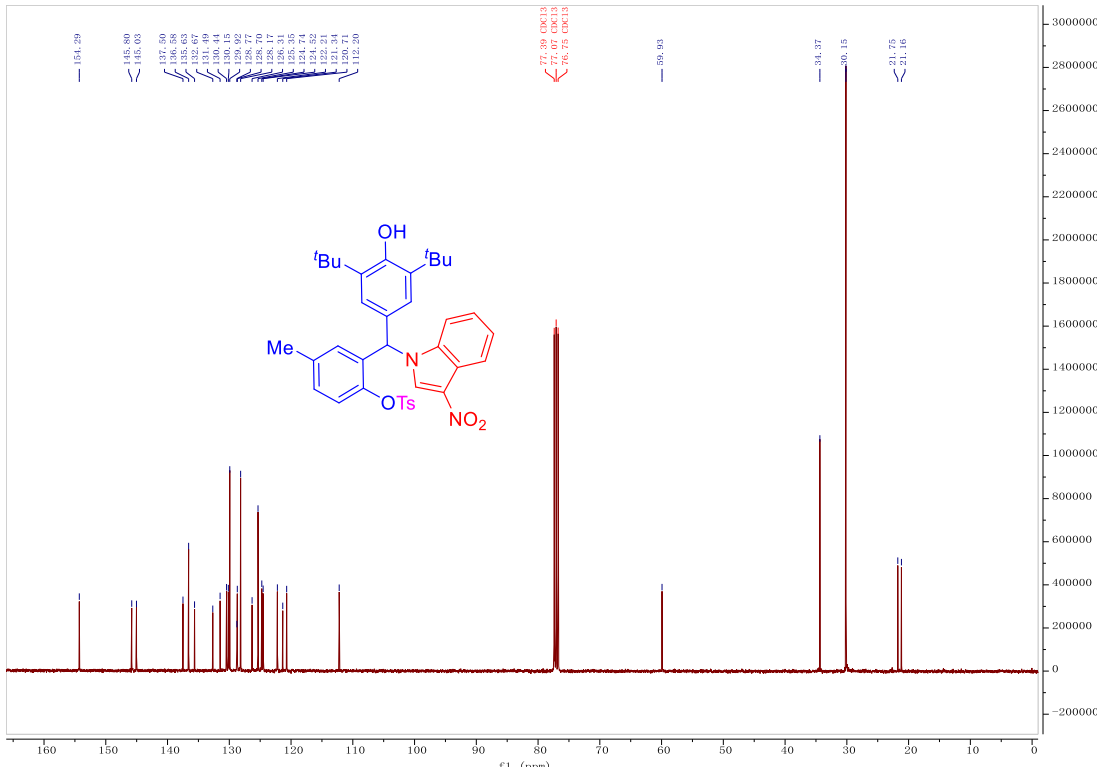

**<sup>1</sup>H NMR spectrum of 3s**

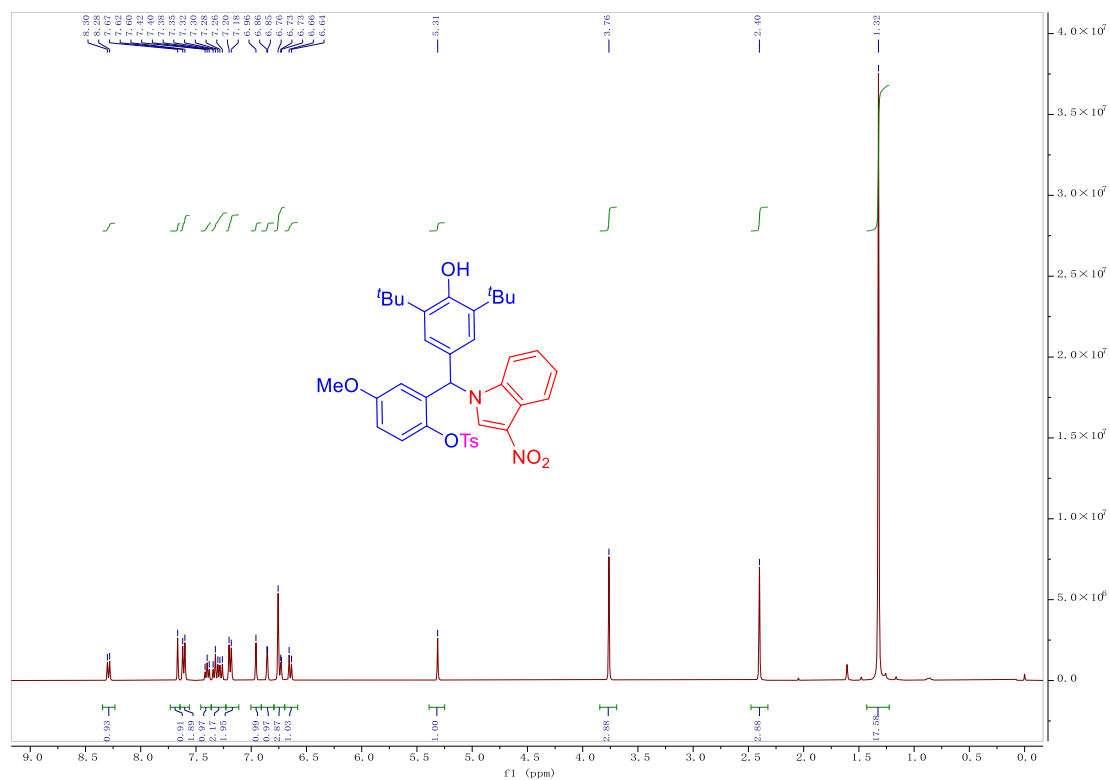

**<sup>13</sup>C NMR spectrum of 3s**

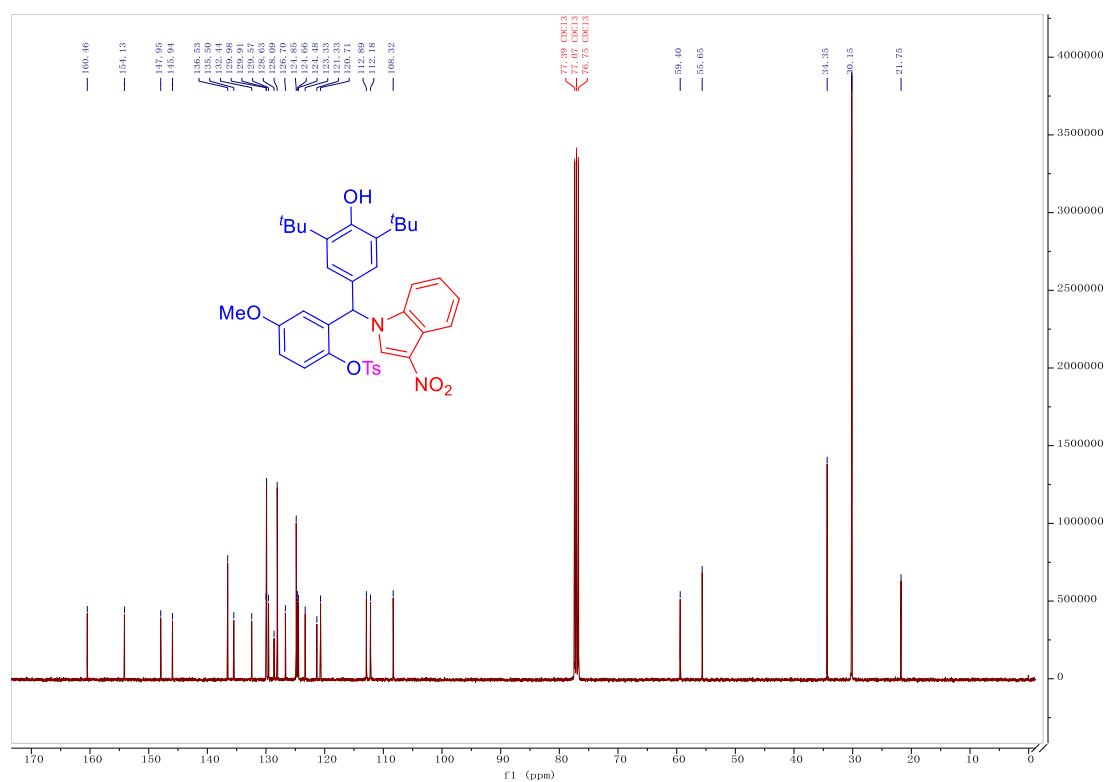

**<sup>1</sup>H NMR spectrum of 3t**

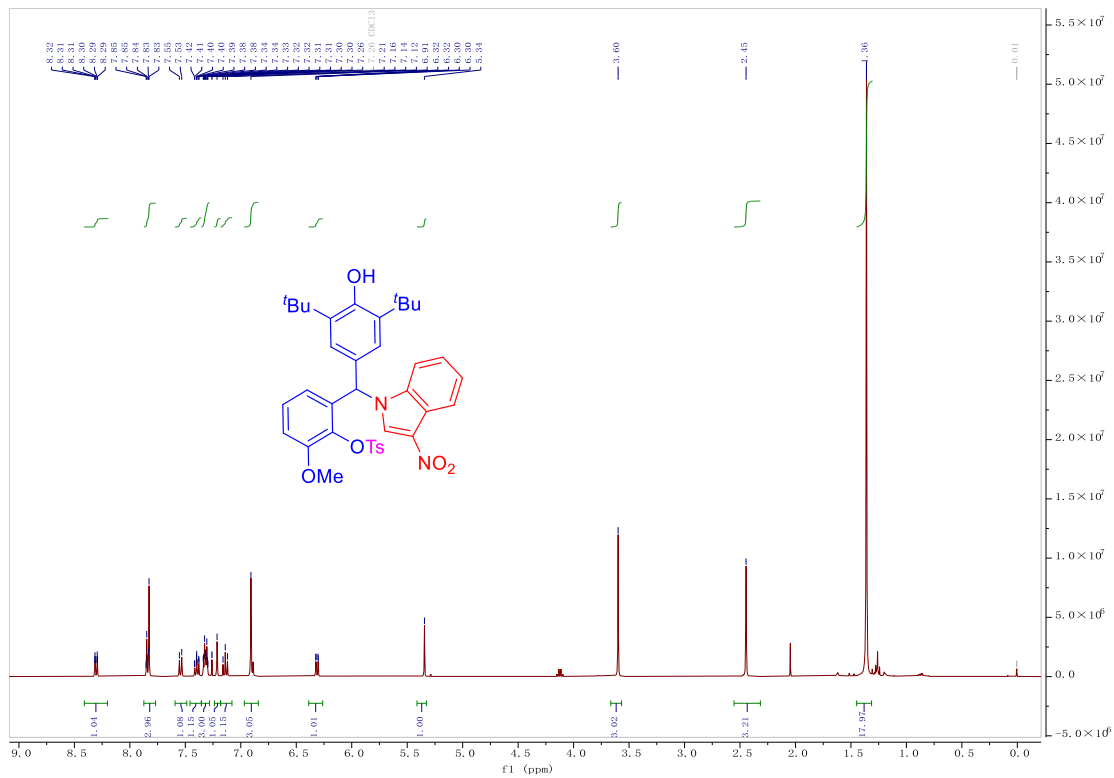

**$^{13}\text{C}$  NMR spectrum of 3t**

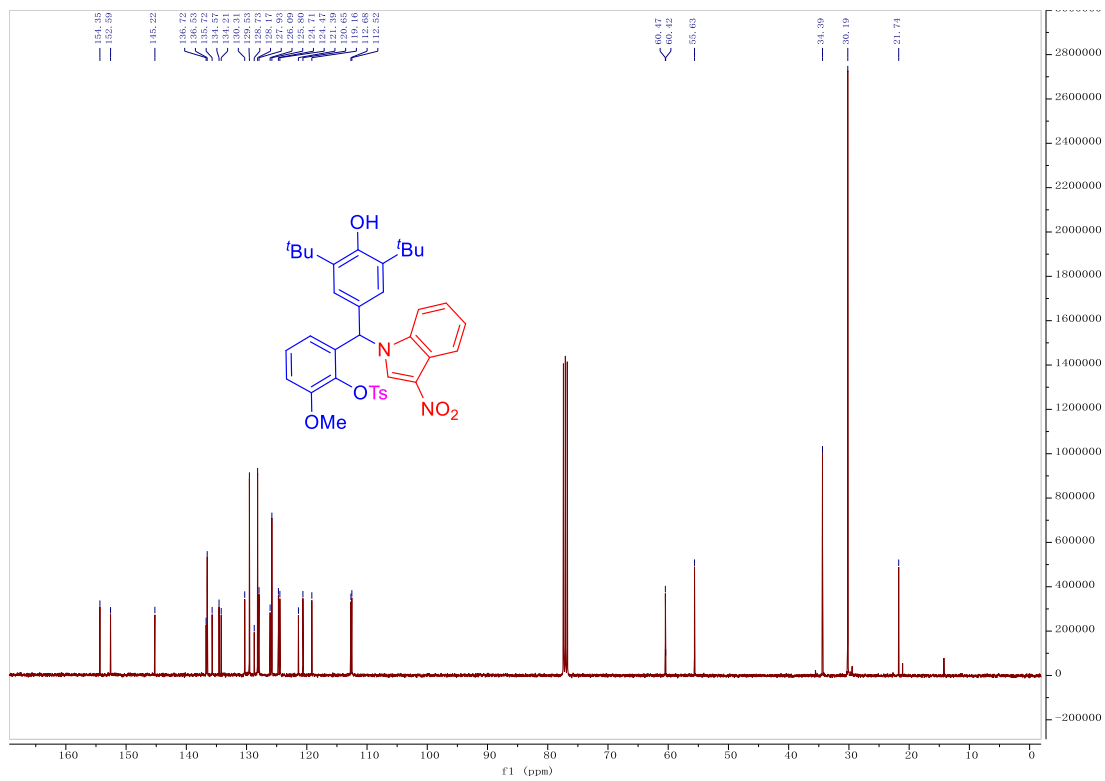

**<sup>1</sup>H NMR spectrum of 6**

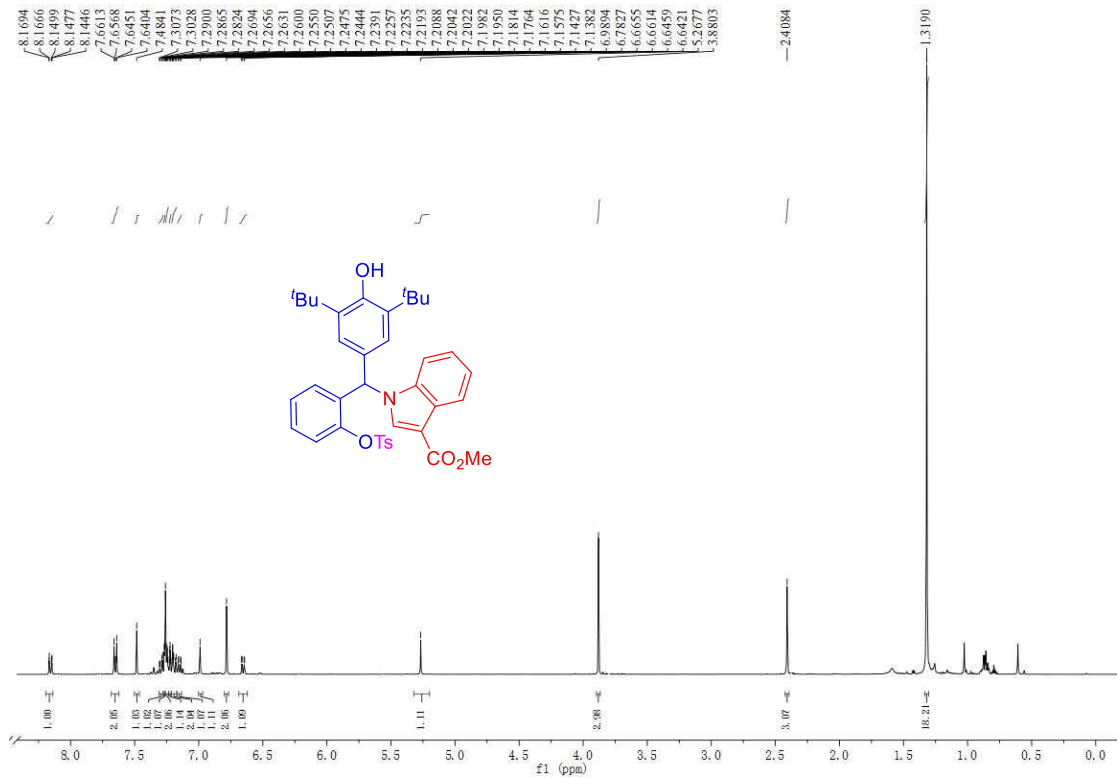

**$^{13}\text{C}$  NMR spectrum of 6**

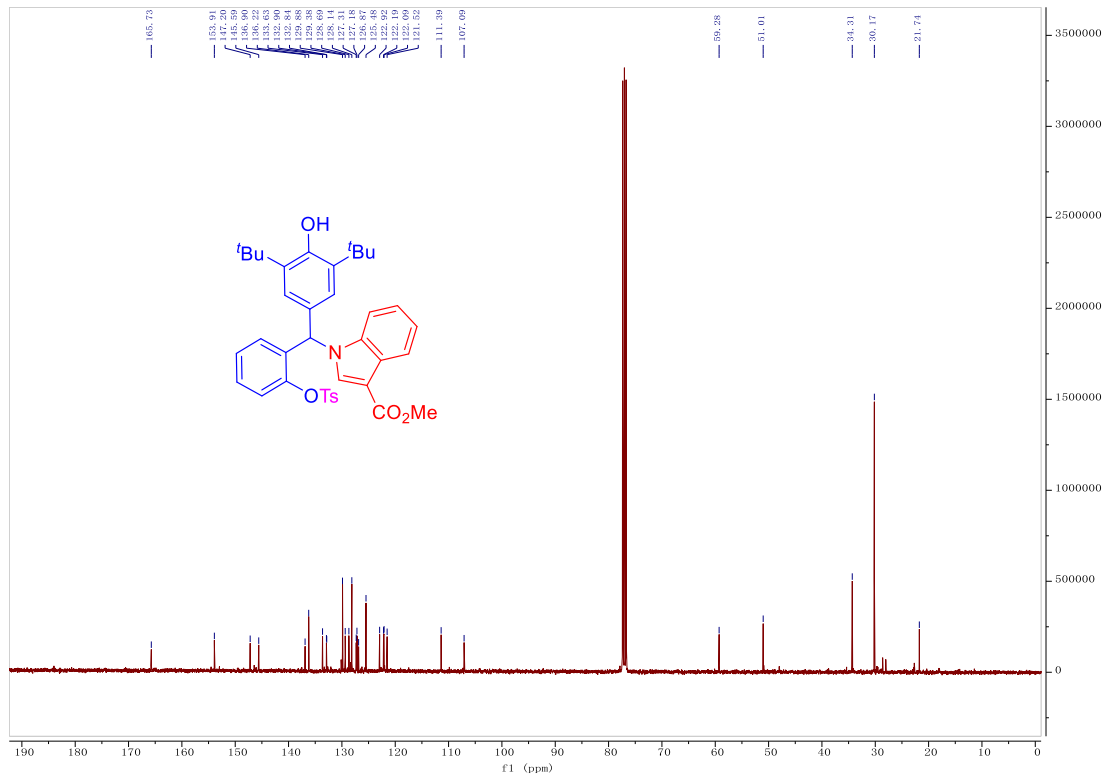



**<sup>1</sup>H NMR spectrum of 11**

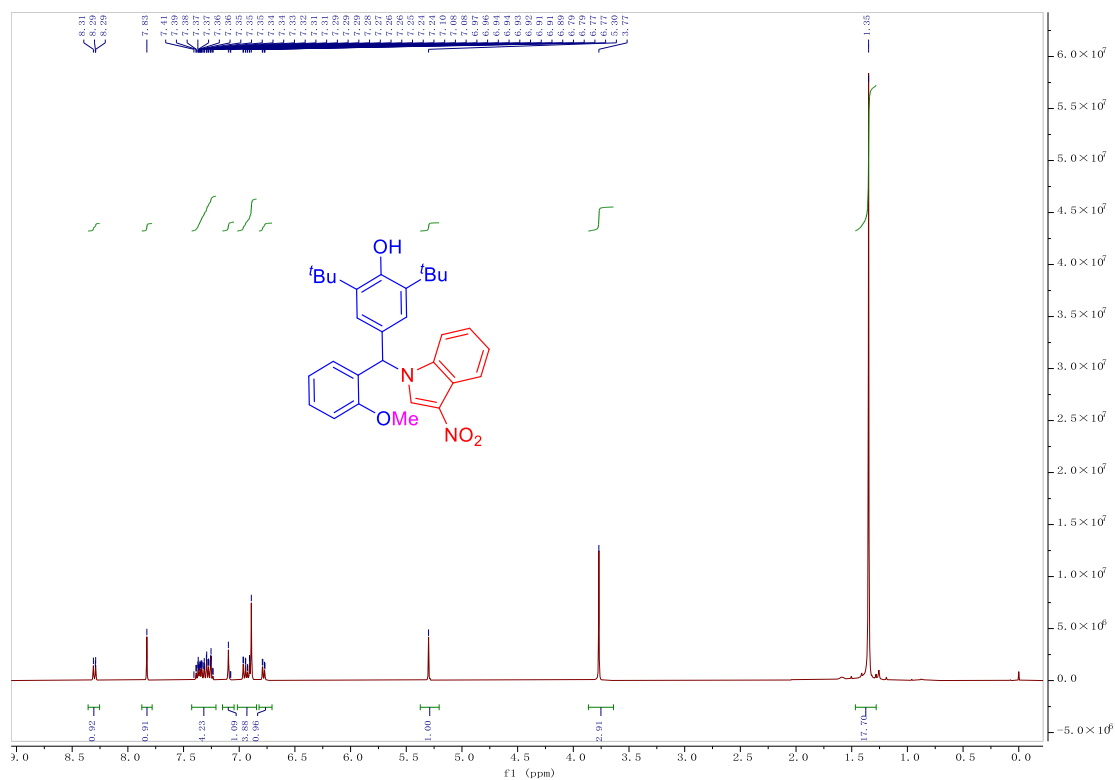

**<sup>13</sup>C NMR spectrum of 11**

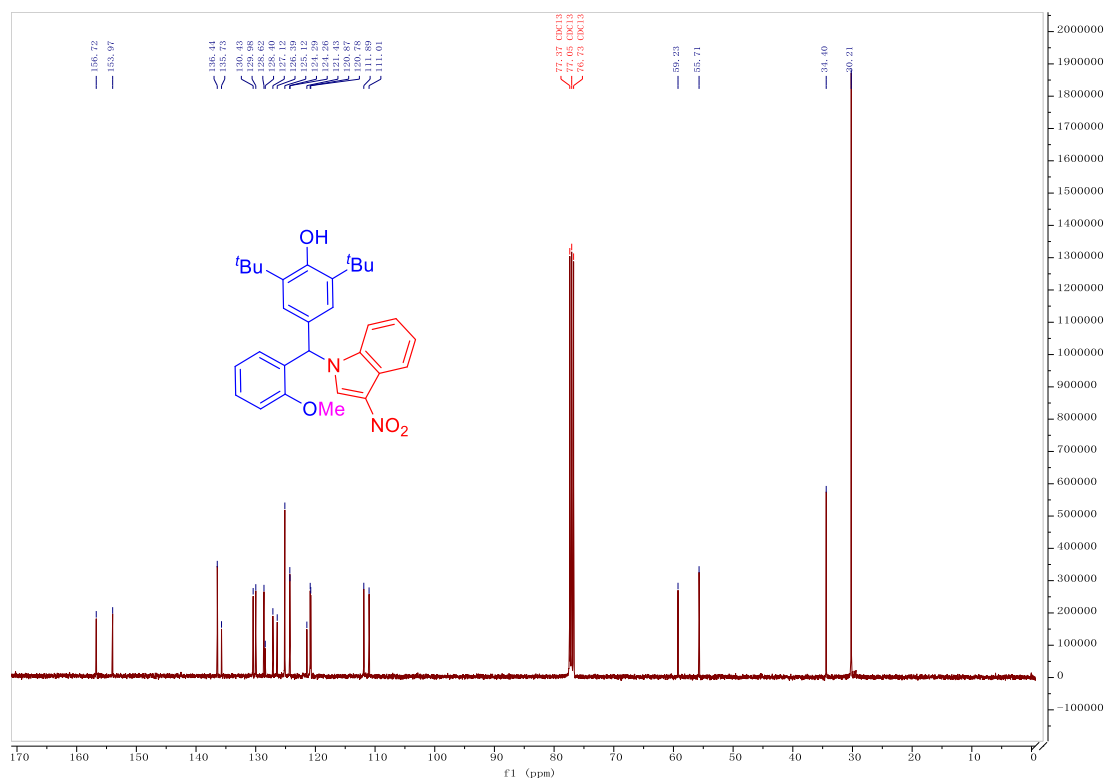

Supplement: s1 [file s1]
